# Following cell type transitions in space and time by combining live-cell tracking and endpoint cell identity in intestinal organoids

Xuan Zheng<sup>1</sup>, Max A. Betjes<sup>1</sup>, Yvonne J. Goos<sup>1</sup>, Guizela Huelsz-Prince<sup>1</sup>, Hans Clevers<sup>2</sup>, Jeroen S. van Zon<sup>1\*</sup>, Sander J. Tans<sup>1,3\*</sup>

<sup>1</sup> AMOLF, Amsterdam, Netherlands

<sup>2</sup> Hubrecht Institute, Royal Netherlands Academy of Arts and Sciences (KNAW) and UMC Utrecht, 3584 CT Utrecht, the Netherlands

<sup>3</sup> Bionanoscience Department, Kavli Institute of Nanoscience Delft, Delft University of Technology, Delft, Netherlands

\* Corresponding authors

## Abstract:

Elucidating the dynamics of cellular differentiation in space and time is key to advancing organoid biology and technology. Direct visualization of differentiation patterns is challenging, however, in part because of the difficulty of simultaneously detecting all relevant cell types by fluorescence imaging. Here we present TypeTracker, which determines the differentiation trajectories of all cells within a region of interest, including their type transitions, growth, divisions, and changes in spatial organization. We show how the lineage tree topology, as determined by automated cell tracking, allows for the retrospective identification of cell types across multiple generations. The data revealed various surprising aspects of intestinal organoid differentiation, including symmetric fate adoption by sister cells, cell type abundance regulated by division, and type commitment of cells occurring prior to their spatial reorganization. Our method can be applied broadly to study other organoid systems and to screen for compounds that affect differentiation programs.

## Introduction

The past decade has brought groundbreaking developments in organoid technology<sup>1-3</sup>. Key to the potential of organoids is their ability to *in vitro* generate the diverse cell types and 3D architectures that characterize *in vivo* organ tissue. Hence, organoids enable a host of new approaches to study organ development, self-renewal, and pathology<sup>4</sup>. Various features of the cellular architecture of organoids have been established using immunostaining, fluorescence microscopy, and single-cell RNA sequencing<sup>5-7</sup>. However, these methods do not detect the dynamics of cellular differentiation or spatial organization, and hence are limited in their ability to identify underlying patterns, phenotypes, and mechanisms. Lineage tracing<sup>8-10</sup> can visualize the offspring of certain cells in a snapshot image but does not identify cell type transitions or characterize cell movement, thus leaving the spatio-temporal differentiation dynamics largely unaddressed.

In parallel, important advances have been achieved in 3D video microscopy. Techniques such as confocal and light-sheet imaging have visualized the dynamics of cell proliferation and collective cell migration in major developmental transitions<sup>11-13</sup>. Machine learning has more recently enabled automated tracking of individual cells in time, in developing embryos as well as in diverse organoid

40 systems<sup>13-16</sup>. Yet, video microscopy has far been limited in studying spatiotemporal differentiation  
41 programs. Cell fate markers can in principle be followed using fluorescent protein markers<sup>17-19</sup>.  
42 However, the significant number of cell types (over 5 in intestinal organoids) and the need to label  
43 the nuclei for cell tracking, presents major challenges in terms of phototoxicity, genetic  
44 construction, and wavelength overlap. Indeed, while fluorescence microscopy can visualize the  
45 Lgr5 intestinal stem cell marker<sup>20</sup>, it has been challenging to expand this approach to include the  
46 other intestinal cell types<sup>17</sup>, and to combine it with cell tracking to reveal the spatio-temporal  
47 differentiation dynamics, which indeed remains uncharacterized. This capability is crucial, as key  
48 open questions about the formation and maintenance of multi-cellular architectures involve the  
49 moments and locations that cells commit to a new fate, the genealogical relations between cell  
50 types, and the neighboring cells that can define dynamically changing spatial niches<sup>21</sup>. These  
51 issues are ideally addressed by characterizing most if not all cells in a particular region of interest.  
52 Such a method would be of direct relevance to many types of organoid systems, as well as drug  
53 screening applications.

54 Here we present TypeTracker, an approach that integrates cell type identification with cell tracking  
55 to directly view the organoid differentiation dynamics. It works by propagating the differentiation  
56 state of each cell back in time along the branched lineage tree, using cell tracking to determine  
57 the lineage tree during organoid growth, and several rounds of antibody staining to determine the  
58 endpoint cell types (**Fig. 1a**). The resulting multi-dimensional data identifies the moments that  
59 cells commit to a new type, their movements and genealogical relations to all other cells, and  
60 what neighbors they have interacted with at any point in time. It can be used generally for any  
61 organoid system with proliferating and differentiating cells, and by most laboratories, as it requires  
62 only confocal microscopy, immunostaining, and software for data integration.

63 We applied TypeTracker to mouse intestinal organoids, which are 3D cellular assemblies that  
64 display crypt and villus domains (**Fig. 1b**). Our data showed that differentiation was controlled to  
65 a surprising degree by information transmitted through the lineage. Specifically, sister cells  
66 systematically adopted the same fate, including secretory fates, with their fate being determined  
67 by the mother cell. The lineage trees showed significant variability, with some sub-lineages  
68 moving up the crypt-villus axis while other related lineages in the same tree remained deep within  
69 the crypt in the stem cell zone. The order of events was notable. We did not observe the lineages  
70 first moving up and away from their relatives, and then committing to a new type, as expected in  
71 current models. Rather, we found lineages that committed to a new type first, while still nearby  
72 their relatives that retained stem cell fate and then separated from them subsequently. These  
73 data are consistent with cells sorting in space following specification. Our TypeTracker approach  
74 can be used broadly to elucidate differentiation programs of organoid systems, how they are  
75 modulated by disease mutations or external cues, and can be readily combined with fluorescence-  
76 based monitoring of processes such as WNT signaling, apoptosis, or actin polymerization.

77

78

## 79 Results

80 **Overview of TypeTracker.** Our method consists of four main steps (**Fig. 1a**). First, movies of  
81 organoids growing in Basement Membrane Extract (BME) gel are recorded by 3D confocal  
82 microscopy (**Extended Data Fig. 1a-c**). We focus on intestinal organoids and image complete  
83 organoids or their crypt protrusions every 12 minutes for 60 hours, using a H2B-mCherry marker  
84 to detect cell nuclei (**Extended Data Fig. 1d**). Second, we employ a convolutional neural  
85 network<sup>14</sup> to track the nuclei in space and time across several generations (**Fig. 1b**, **Extended**  
86 **Data Fig. 1e**), and visualize their genealogical relations using lineage trees (**Fig. 1c**, **Extended**  
87 **Data Fig. 2**). Consistently, proliferative lineages, which display up to seven divisions, are mostly  
88 found at the crypt bottom, while non-dividing cells are abundant in the villus-like region of the  
89 organoid. Third, we perform multiple rounds of antibody staining to determine the cell types at the  
90 movie endpoint, as detailed below (**Fig. 1d, e**). Hence, we identify the main types found in the  
91 intestine: stem, enteroendocrine, Paneth, goblet, enterocyte, transit-amplifying, as well as an  
92 immature mucus producing type. Fourth, we infer the cell types at earlier timepoints, starting at  
93 the endpoint of the lineage tree and progressively moving back along each branch to the  
94 beginning, using a set of rules that we describe in detail below. Hence, one obtains virtual  
95 organoids that present the spatial location, division events, movements, and type of all cells (**Fig.**  
96 **1f**). The completeness of this method, which identifies all cells in a region of interest and  
97 associated lineage trees, enables our backpropagation approach and analysis of spatio-temporal  
98 correlations.

99  
100 **Cell type identification.** We developed an approach to map cell type data, as obtained by several  
101 rounds of antibody staining, onto the endpoint of the movie and lineage trees (**Fig. 1d, e**). This  
102 method includes washing protocols that minimize organoid deformations, antibody stripping  
103 between rounds, and a min-cost flow solver algorithm<sup>22</sup> combined with manual correction to link  
104 cells in the staining images to the cells at the movie endpoint. Stem cells were identified by  
105 Olfactomedin 4 (Olfm4)<sup>23</sup>, enterocytes by Aldolase  $\beta$  (AldoB)<sup>24</sup> and enteroendocrine cells (EECs)  
106 by Chromogranin A (Cga)<sup>25</sup>. Consistently, Olfm4+ cells were found only at the crypt bottom, Cga+  
107 cells in both the crypt and villus regions and AldoB+ cells exclusively in the villus region (**Fig. 1f**).  
108 Stem cells and EECs did not stain for any of the other markers used, while enterocytes also  
109 stained for Cytokeratin 20 (KRT20)<sup>26</sup>, as expected. Wheat Germ Agglutinin (WGA), which stains  
110 intestinal mucus<sup>27,28</sup>, labeled cells in the crypt and villus regions. A subset of these were also  
111 positive for Lysozyme (Lyz) and thus identified as Paneth cells<sup>29</sup>, while another subset expressed  
112 KRT20 and identified as goblet cells<sup>26</sup>. Consistently, the former often contained granules that are  
113 typical of Paneth cells, while the latter had a cup-shaped morphology that characterizes goblet  
114 cells (**Extended Data Fig. 3**). A remaining subset of WGA+ cells expressed neither Lyz nor  
115 KRT20. Evidence provided below suggests that these are immature Paneth and goblet cells,  
116 which we thus refer to as immature mucus producing cells (IMPCs). We identified a population of  
117 cells within the crypt that did not stain for any of our markers, which are identified as transit-  
118 amplifying (TA) cells based on evidence discussed below.

119  
120 **Sister cells adopt the same type.** Prominent in our data is that endpoint types generally came  
121 in pairs, with sister cells consistently displaying the same fate (**Fig. 1c**). Statistical analysis  
122 showed that 97% of all endpoint sister (N=869 sister pairs in 9 organoids) were of the same type.

123 All types, including secretory types, exhibited this symmetry, as evidenced by the dominant  
124 diagonal in the sister-sister cell type histogram (**Fig. 2a**). This consistent type-symmetry between  
125 sisters is notable. Intestinal stem cells are proposed to exit from their cell cycle when committing  
126 to a secretory fate<sup>30,31</sup>, which would rather yield asymmetry, as one sister may then adopt a  
127 secretory fate that the other does not. External cues can, in principle, produce a local environment  
128 that is similar for the two sister cells, and hence drive them to the same fate. However, a priori  
129 there is then no reason why only sisters should be impacted, as also non-sister cells like cousins  
130 can be neighbors. Importantly, the fates of many sister pairs were different than their direct  
131 cousins (**Fig. 1c**, stars). This showed that the underlying type transitions did affect sisters  
132 specifically and occurred during the observed growth period of the lineage. These data indicated  
133 that the type transitions rather occurred in the mother (or earlier generations), which subsequently  
134 divided to produce two daughters of the same type. Larger subtrees, which for instance showed  
135 two or more sister pairs of the same type (**Fig. 1c**, blue enterocyte subtree, **Extended Data Fig.**  
136 **2**), were consistent with divisions occurring after type commitment and hence producing cells of  
137 the same type.

138

139 **Dependence of cell age on differentiation state.** The age of the cells at the movie endpoint  
140 was defined as the time since the last observed division (**Fig. 2b**). Notably, the TA cells showed  
141 a statistically identical age distribution as the stem cells, in line with the notion that they are highly  
142 proliferative<sup>31</sup>. EECs, enterocytes, Paneth, and goblet cells also showed a broad distribution, but  
143 with an average age that was substantially larger than the stem and TA cells, consistent with their  
144 terminally differentiated nature. The ages of these terminally differentiated cells were rarely below  
145 20 hours (**Fig. 2b**), suggesting that the involved markers (Cga, AldoB, Lyz and KRT20) took a  
146 substantial amount of time to become observable.

147

148 **Cell type backpropagation.** To infer the cell type along the lineages of the family tree, we used  
149 the lineage tree topology and the above observations (**Fig. 2a, b**). Starting at the lineage  
150 endpoints, we propagated the endpoint types back in time using this process: 1) From one  
151 timepoint to the previous timepoint, the type is initially assigned as unchanged if branch points  
152 (divisions) are not traversed, but may later be updated when a cell type transition is identified. 2)  
153 At branch points, the two involved daughters are considered: if both display the same (inferred)  
154 type, the mother is assigned as that type, as discussed above (**Fig. 2a**). 3) If one daughter is a  
155 stem cell and the other is not, the mother is assigned as a stem cell, based on the notion that  
156 stem cells are generated from stem cells. 4) If one daughter is a TA cell and the other is not, nor  
157 a stem cell, the mother is assigned as a TA cell. This rule is based on the TA cells being  
158 proliferative like stem cells (**Fig. 2b**), which makes the alternative (the mother has the identity of  
159 the non-TA daughter) unlikely. In the last two cases (3 and 4), a type-transition is inferred in one  
160 of the daughters. We mark the latter with an arrow halfway the cell cycle (**Fig. 2c**). These rules  
161 allowed the backpropagation of complete trees from the end to the beginning (**Fig. 2d, Extended**  
162 **Data Fig. 4**).

163 Next, we estimated stemness by quantifying the fluorescence intensity of Lgr5-GFP, a well-known  
164 stem-cell marker<sup>32</sup>, in order to further test our method. Note that phototoxicity, which is stronger  
165 for GFP than for the mCherry that is used for nuclei tracking, limits the frequency and duration of  
166 such cell fate quantification during growth. The GFP signal at the movie endpoint was indeed

167 correlated quantitatively with the measured Olfm4 intensity (**Extended Data Fig. 5a,b**). Cells  
168 inferred as stem cells by backpropagation indeed also showed higher GFP expression, while  
169 inferred enterocytes or TA and goblet cells consistently showed lower GFP (**Extended Data Fig.**  
170 **5c**). Lineages that were inferred to lose stemness and transition to the TA type indeed showed  
171 decreasing GFP (**Extended Data Fig. 5d**). Paneth cell granules, which can be visualized during  
172 organoid growth, also showed consistency between inferred and real-time measured type (**Fig.**  
173 **2f**). Note that limitations of our method are described in the discussion.

174

175 **Differentiation pathways.** The observed differentiation pathways indicated notable features (**Fig.**  
176 **2d, Extended Data Fig. 4**). Trees typically displayed 1 to 3 cell type transitions, thus yielding sub-  
177 trees of the new type, while the old type was maintained in another sub-tree, and some lineages  
178 showed two consecutive type transitions. For instance, a stem cell tree was first shown to spawn  
179 a TA-subtree, which in turn generated an enterocyte subtree (**Fig. 2d**, tree 1). This order, in which  
180 TA is an intermediate type between stem and terminally differentiated types<sup>33</sup>, is consistent with  
181 the sister-sister cell type histogram: besides the dominant diagonal, low-frequency off-diagonal  
182 entries indicated stem-TA sister pairs, and a few pairs of one TA and one terminally differentiated  
183 type, but never sister pairs showing two different terminally differentiated types (**Fig. 2a**). The  
184 latter would be in line with models where stem cells first differentiate into secretory precursors,  
185 which in turn can generate different terminally differentiated types. To further probe this notion,  
186 we extracted the largest possible subtrees from our data that contained two types, and found that  
187 none had two different secretory types, nor one secretory and one absorptive type. Instead, they  
188 typically combined TA and either stem (52.2%) or a terminally differentiated state (31.4%)  
189 (**Extended Data Fig. 6**), consistent with the sister relations (**Fig. 2a**). Among these subtrees, we  
190 also found cases (16.4%) that combined stem and terminally differentiated states (**Fig. 2d**, tree 2  
191 and 3). The latter could indicate that the intermediate TA state lasted for less than one cell cycle  
192 and could not be detected, or that these lineages have a negligible TA role.

193

194 **Division rather than differentiation rates control enterocyte abundance.** Cell type transitions  
195 to enterocytes were less frequent than to the secretory types combined (about 1.5-fold), even as  
196 enterocytes outnumbered secretory cells. To investigate this issue, we quantified the number of  
197 consecutive divisions in each differentiation state (**Fig. 2e**). The EEC, goblet and IMPC secretory  
198 states mostly showed one division, sometimes two. In contrast with common thinking<sup>31</sup>, we found  
199 Paneth cells to divide as well (**Fig. 2e**). The inferred Paneth cell divisions were indeed confirmed  
200 by the continuous presence of granules that are specific to Paneth cells and are observable  
201 without labeling (**Fig. 2f**). Next, we quantified the cell cycle duration for each cell type as the time  
202 between birth and division. Notably, these complete cell cycles that also showed division at the  
203 end were similarly long for all types including secretory and stem types (**Fig. 2g**). After the  
204 divisions, the secretory lineages were observed to stop dividing, consistent with a cell cycle exit.

205 Enterocytes displayed significantly more divisions than secretory cells. The former reached to up  
206 to 5 divisions, not far off from the 6 divisions seen for stem and TA states (**Fig. 2e**). Hence, after  
207 specification, absorptive lineages generated substantially more cells than secretory lineages,  
208 which thus offset their comparatively low transition rate. This finding is consistent with recent data  
209 on 2D intestinal enteroid monolayer, in which absorptive lineages showed larger clone sizes than  
210 secretory lineages<sup>34</sup>. Enterocytes were even found to exhibit the lowest mean cell cycle duration

211 (12.5 h), significantly lower than for both stem (15.5 h) and TA cells (14.1 h) (**Fig. 2g**). Overall,  
212 these results indicate that relative abundance is controlled by the cell lineage dynamics, in  
213 particular the number of divisions after specification.

214

215 **The spatio-temporal differentiation program.** Access to spatial dynamics is a key benefit of  
216 our approach. The positions of inferred cell types mapped along the crypt-villus axis as expected,  
217 with stem and Paneth most towards the bottom, followed by IMPC, EEC, TA, enterocyte, and  
218 goblet<sup>33</sup> (**Fig. 3a, b, Extended Data Fig. 7a**). In addition, we can now map the point of  
219 commitment onto the spatial organoid structure. Commitments to secretory types were broadly  
220 distributed along the crypt-villus axis, but typically occurred deeper in the crypt than absorptive  
221 commitments (**Fig. 3c**). The latter also distributed broadly and were positioned well within the  
222 crypt. Notably, when we mapped full lineage trees along the crypt-villus axis, we found that these  
223 committing cells are still in the same approximate spatial region as their stem-cell relatives that  
224 had not differentiated (**Fig. 3d, e, Extended Data Fig. 7b, c**). The commitment to secretory and  
225 absorptive fates thus occurred early, rather than while moving upwards in the crypt as often  
226 assumed<sup>33</sup>. Spatial separation from these stem-cell relatives did occur, after the type transition  
227 (**Fig. 3d, e**). This separation was most evident for lineages destined for the villus region  
228 (enterocytes and goblet cells), with the stem lineages they arose from remaining confined to the  
229 crypt (**Fig. 3d, e, top trees**). Such separation from relatives was not always observed, specifically  
230 for cells committing to a secretory type (IMPC) near the crypt bottom and remaining there (**Fig.**  
231 **3d bottom tree, Fig. 3e, top tree**). Consistently, the mean migration speed is highest for  
232 enterocytes and goblet cells, and lowest for secretory fates like Paneth cells and IMPC's (**Fig. 3f**).

233

234 **Promotion of sister separation.** Secretory types were typically born as sisters (**Fig. 2a**) and,  
235 hence, as neighbors. We wondered how this finding relates to the observation of single Paneth  
236 and goblet cells being surrounded by stem cells and enterocytes, respectively<sup>1,35</sup>. In our data,  
237 most neighbors that were *not* sisters (and hence can be of different type), were still neighbors  
238 after 2h (85%) and 10h (57%), independently of each neighbor's cell type (**Fig. 3g,h, Extended**  
239 **Data Fig. 7d**). Neighbors that *were* sisters, which almost always were of the same type, separated  
240 more frequently after 2h (71% remains neighbors), likely due to arrangements directly following  
241 divisions<sup>36</sup>. Surprisingly, Paneth and IMPC sisters showed even stronger separation over longer  
242 timescales, and more than the other types, with less than 20% still neighbors after 10h (**Fig. 3i**).  
243 Sisters, and in particular of these secretory types, thus appear to rearrange more strongly to  
244 achieve interspersions. These findings extend 'conveyor belt' models where movement is driven  
245 by pushing from growing and dividing neighbors, and instead indicates that the promotion of cell  
246 separation contributes to cell type patterning in the epithelium.

247

## 248 Discussion

249 While our approach allows visualization of the spatio-temporal differentiation dynamics, it also  
250 has a number of limitations. First, cell type transitions may be missed when they are too frequent.  
251 Specifically, it cannot deduce the presence of stem or TA cells, or transitions from them, if the  
252 tree endpoint only shows differentiated types. This issue can be mitigated partly by limiting the

253 growth duration. Second, if cells would exhibit multiple sequential transitions without dividing, or  
254 show reversible transitions back to the stem or TA type, the method would be less suitable. Third,  
255 used antibodies may not identify immature types. Long type maturation is indeed suggested by  
256 our data, including the dominant sister symmetry (**Fig. 2a**), and the high age of differentiated cells  
257 at movie endpoint (**Fig. 2b**), noting that rapid type maturation after commitment would yield sister  
258 asymmetry in the staining. This issue impacts marker-based methods more generally. Moreover,  
259 our method provides a key advantage in overcoming this limitation, by detecting early commitment  
260 using lineage relations even when the phenotype is not detectably expressed yet.

261 The spatio-temporal view provided by TypeTracker revealed a number of notable findings, even  
262 as many observations agree with existing models, like the presence of stem cell and TA zones,  
263 and overall migration along the crypt-villus axis (**Fig. 3a, d-f**). Fate commitment is often described  
264 to occur in the TA zone, as the cells move up the crypt and down the spatial WNT gradient, with  
265 secretory and absorptive progenitors emerging in close vicinity, such that these two fates and  
266 their ratios can be regulated by lateral Notch inhibition between neighbors, and with newly  
267 specified Paneth cells subsequently moving down to the crypt bottom<sup>33,37</sup>.

268 Our data showed committing cells positioned at similar locations as their stem cell relatives, and  
269 spatial separation taking place subsequently (**Fig. 3c-e**). The latter was clear in particular for  
270 absorptive and secretory types that moved towards the villus region, while their stem cell relatives  
271 within the same lineage tree remained at the same height. We found commitment even deeper in  
272 the crypt for secretory types such as Paneth cells that ended up at the crypt bottom, and hence  
273 did not show the proposed downward migration after commitment<sup>33,37</sup>. We did not observe the  
274 opposite: stem cells that first move away from their stem cell relatives and then differentiate while  
275 continuing to move upwards to the villus region, or downward to the crypt bottom. Overall, our  
276 data suggested a picture in which cells first differentiate and subsequently spatially sort and  
277 reorganize.

278 Notable is also the highly symmetric adoption of identical fates by sister cells, including secretory  
279 fates. The data indicated that this symmetry stems from genealogical rather than spatial factors,  
280 with mother cells committing and passing the new fate down to their daughters (**Fig. 2a-d, 3d, e**).  
281 Neighbor analysis showed sister cells to spatially separate even faster than non-sister neighbors  
282 (**Fig. 3g-i**). In addition, the majority of the spatially isolated secretory cell pairs (two nearby cells  
283 of the same type that are surrounded by cells of different types) were sisters (82%). Importantly,  
284 these findings do not suggest or imply that spatial cues are not critical to the mother's commitment.  
285 Yet, our findings contrasts with secretory fate commitment in the intestine being associated with  
286 cell cycle exit<sup>38</sup>, and raises the question whether at least one division is important to completing  
287 differentiation, as suggested<sup>39</sup>. Interestingly, previously reported clonal expansion of enterocytes  
288 and Goblet cells after fate commitment in mouse colon are consistent with our findings<sup>10</sup>. Our data  
289 further showed that the ratio between absorptive and secretory cells was affected more by  
290 increased divisions after enterocyte specification than by more frequent enterocyte specification  
291 events (**Fig. 2e**), as for instance controlled by Notch signaling<sup>40</sup>. Notch signaling between  
292 neighbors is proposed to restrict secretory fate to a single cell<sup>40</sup>. Our observation of neighboring  
293 sisters with the same secretory fate implies that Notch signaling occurs early and transiently, likely  
294 in the mothers of secretory cells.

295 Our method can be applied broadly to study the spatio-temporal differentiation programs of  
296 organoid systems, and how they are impacted by external conditions such as metabolic  
297 compounds or interleukins, interacting cell types including bacteria and immune cells, and disease

298 mutations. Its focus on spatial and temporal characterization makes it distinct from and  
299 complementary to other methods such as single cell RNA sequencing or multiplexed tissue  
300 imaging<sup>41,42</sup>. The TypeTracker approach follows systematically all cells in a region of interest, thus  
301 allowing direct correlative analysis, and is straightforward to implement as it requires only confocal  
302 microscopy, antibody staining, and the algorithms we present here. It can also readily be  
303 combined with other measurements, such as endpoint Single Molecule Fluorescence In Situ  
304 Hybridization (smFISH) and real-time fluorescence microscopy of various cellular processes and  
305 signals.

306

### 307 **Author contributions**

308 X.Z., H.C., J.V.Z. and S.T. conceived the research. X.Z., J.V.Z. and S.T. wrote the manuscript  
309 with the input and discussion of all authors. X.Z., Y.J.G, G.H.P tested the antibodies and dyes  
310 and optimized protocols of fixation. Y.J.G adapted the antibody stripping protocol. X.Z. carried out  
311 the time-lapse imaging of organoids, followed by multiple rounds of antibody staining. X.Z. and  
312 Y.J.G conducted live-cell tracking, endpoint cell type identification and mapping cell types to  
313 lineages. X.Z. developed the Python scripts to perform most of the data analysis. M.A.B.  
314 developed the Python scripts to analyze cell neighbors and separation rates.

### 315 **Acknowledgements**

316 We thank N. Sachs and J. Beumer for providing the mouse intestinal organoids, R. Kok, K.  
317 Spoelstra, P. Ender for detailed discussions about the project and comments of the manuscript,  
318 S. Semrau and K. Ganzinger for comments and critical reading of the manuscript. X.Z. was funded  
319 by the NWO Building Blocks of Life grant from the Dutch Research Council, number 737.016.009.  
320 M.A.B. was funded by the NWO Groot grant from the Dutch Research Council, number 2019.085.

### 321 **Declaration of interests**

322 H.C. is inventor of several patents related to organoid technology; his full disclosure is given at  
323 <https://www.uu.nl/staff/JCClevers/>.

324

## 325 **References**

- 326 1 Sato, T. *et al.* Single Lgr5 stem cells build crypt-villus structures in vitro without a mesenchymal  
327 niche. *Nature* **459**, 262-265, doi:10.1038/nature07935 (2009).
- 328 2 Lancaster, M. A. *et al.* Cerebral organoids model human brain development and microcephaly.  
329 *Nature* **501**, 373-379, doi:10.1038/nature12517 (2013).
- 330 3 Miller, A. J. *et al.* Generation of lung organoids from human pluripotent stem cells in vitro.  
331 *Nature Protocols* **14**, 518-540, doi:10.1038/s41596-018-0104-8 (2019).
- 332 4 Clevers, H. Modeling Development and Disease with Organoids. *Cell* **165**, 1586-1597,  
333 doi:10.1016/j.cell.2016.05.082 (2016).
- 334 5 Lukonin, I. *et al.* Phenotypic landscape of intestinal organoid regeneration. *Nature* **586**, 275-280,  
335 doi:10.1038/s41586-020-2776-9 (2020).
- 336 6 Grün, D. *et al.* Single-cell messenger RNA sequencing reveals rare intestinal cell types. *Nature*  
337 **525**, 251-255, doi:10.1038/nature14966 (2015).



- 338 7 Camp, J. G. *et al.* Human cerebral organoids recapitulate gene expression programs of fetal  
339 neocortex development. *Proceedings of the National Academy of Sciences* **112**, 15672-15677,  
340 doi:10.1073/pnas.1520760112 (2015).
- 341 8 Kretzschmar, K. & Watt, Fiona M. Lineage Tracing. *Cell* **148**, 33-45,  
342 doi:<https://doi.org/10.1016/j.cell.2012.01.002> (2012).
- 343 9 Snippert, H. J. *et al.* Intestinal Crypt Homeostasis Results from Neutral Competition between  
344 Symmetrically Dividing Lgr5 Stem Cells. *Cell* **143**, 134-144, doi:10.1016/j.cell.2010.09.016 (2010).
- 345 10 Tóth, B., Ben-Moshe, S., Gavish, A., Barkai, N. & Itzkovitz, S. Early commitment and robust  
346 differentiation in colonic crypts. *Molecular Systems Biology* **13**, 902,  
347 doi:<https://doi.org/10.15252/msb.20167283> (2017).
- 348 11 Rios, A. C. & Clevers, H. Imaging organoids: a bright future ahead. *Nature Methods* **15**, 24-26,  
349 doi:10.1038/nmeth.4537 (2018).
- 350 12 Yue, Y. *et al.* Long-term, in toto live imaging of cardiomyocyte behaviour during mouse ventricle  
351 chamber formation at single-cell resolution. *Nature Cell Biology* **22**, 332-340,  
352 doi:10.1038/s41556-020-0475-2 (2020).
- 353 13 McDole, K. *et al.* In Toto Imaging and Reconstruction of Post-Implantation Mouse Development  
354 at the Single-Cell Level. *Cell* **175**, 859-876.e833, doi:<https://doi.org/10.1016/j.cell.2018.09.031>  
355 (2018).
- 356 14 Kok, R. N. U. *et al.* OrganoidTracker: Efficient cell tracking using machine learning and manual  
357 error correction. *PLOS ONE* **15**, e0240802, doi:10.1371/journal.pone.0240802 (2020).
- 358 15 He, Z. *et al.* Lineage recording in human cerebral organoids. *Nature Methods* **19**, 90-99,  
359 doi:10.1038/s41592-021-01344-8 (2022).
- 360 16 Sugawara, K., Çevrim, Ç. & Averof, M. Tracking cell lineages in 3D by incremental deep learning.  
361 *eLife* **11**, e69380, doi:10.7554/eLife.69380 (2022).
- 362 17 Gehart, H. *et al.* Identification of Enteroendocrine Regulators by Real-Time Single-Cell  
363 Differentiation Mapping. *Cell* **176**, 1158-1173.e1116,  
364 doi:<https://doi.org/10.1016/j.cell.2018.12.029> (2019).
- 365 18 Artegiani, B. *et al.* Fast and efficient generation of knock-in human organoids using homology-  
366 independent CRISPR–Cas9 precision genome editing. *Nature Cell Biology* **22**, 321-331,  
367 doi:10.1038/s41556-020-0472-5 (2020).
- 368 19 Sonnen, K. F. *et al.* Modulation of Phase Shift between Wnt and Notch Signaling Oscillations  
369 Controls Mesoderm Segmentation. *Cell* **172**, 1079-1090.e1012, doi:10.1016/j.cell.2018.01.026  
370 (2018).
- 371 20 Tallapragada, N. P. *et al.* Inflation-collapse dynamics drive patterning and morphogenesis in  
372 intestinal organoids. *Cell Stem Cell* **28**, 1516-1532.e1514, doi:10.1016/j.stem.2021.04.002  
373 (2021).
- 374 21 Betjes, M. A., Zheng, X., Kok, R. N. U., van Zon, J. S. & Tans, S. J. Cell Tracking for Organoids:  
375 Lessons From Developmental Biology. *Frontiers in Cell and Developmental Biology* **9**,  
376 doi:10.3389/fcell.2021.675013 (2021).
- 377 22 Haubold, C., Aleš, J., Wolf, S. & Hamprecht, F. A. in *Computer Vision – ECCV 2016*. (eds Bastian  
378 Leibe, Jiri Matas, Nicu Sebe, & Max Welling) 566-582 (Springer International Publishing).
- 379 23 van der Flier, L. G., Haegerbarth, A., Stange, D. E., van de Wetering, M. & Clevers, H. OLFM4 Is a  
380 Robust Marker for Stem Cells in Human Intestine and Marks a Subset of Colorectal Cancer Cells.  
381 *Gastroenterology* **137**, 15-17, doi:10.1053/j.gastro.2009.05.035 (2009).
- 382 24 Serra, D. *et al.* Self-organization and symmetry breaking in intestinal organoid development.  
383 *Nature* **569**, 66-72, doi:10.1038/s41586-019-1146-y (2019).
- 384 25 Louthan, O. Chromogranin a in physiology and oncology. *Folia Biol (Praha)* **57**, 173-181 (2011).

- 385 26 Chan, C. W. M. *et al.* Gastrointestinal differentiation marker Cytokeratin 20 is regulated by  
386 homeobox gene CDX1. *Proceedings of the National Academy of Sciences* **106**, 1936,  
387 doi:10.1073/pnas.0812904106 (2009).
- 388 27 Bel, S. *et al.* Paneth cells secrete lysozyme via secretory autophagy during bacterial infection of  
389 the intestine. *Science* **357**, 1047-1052, doi:10.1126/science.aal4677 (2017).
- 390 28 Kim, M., Fevre, C., Lavina, M., Disson, O. & Lecuit, M. Live Imaging Reveals *Listeria*  
391 Hijacking of E-Cadherin Recycling as It Crosses the Intestinal Barrier. *Current Biology* **31**, 1037-  
392 1047.e1034, doi:10.1016/j.cub.2020.11.041 (2021).
- 393 29 Sato, T. *et al.* Paneth cells constitute the niche for Lgr5 stem cells in intestinal crypts. *Nature*  
394 **469**, 415-418, doi:10.1038/nature09637 (2011).
- 395 30 Buczacki, S. J. A. *et al.* Intestinal label-retaining cells are secretory precursors expressing Lgr5.  
396 *Nature* **495**, 65-69, doi:10.1038/nature11965 (2013).
- 397 31 Basak, O. *et al.* Mapping early fate determination in Lgr5+ crypt stem cells using a novel Ki67-  
398 RFP allele. *The EMBO Journal* **33**, 2057-2068, doi:<https://doi.org/10.15252/embo.201488017>  
399 (2014).
- 400 32 Barker, N. *et al.* Identification of stem cells in small intestine and colon by marker gene Lgr5.  
401 *Nature* **449**, 1003-1007, doi:10.1038/nature06196 (2007).
- 402 33 Beumer, J. & Clevers, H. Cell fate specification and differentiation in the adult mammalian  
403 intestine. *Nature Reviews Molecular Cell Biology* **22**, 39-53, doi:10.1038/s41580-020-0278-0  
404 (2021).
- 405 34 Sanman, L. E. *et al.* Transit-Amplifying Cells Coordinate Changes in Intestinal Epithelial Cell-Type  
406 Composition. *Developmental Cell* **56**, 356-365.e359, doi:10.1016/j.devcel.2020.12.020 (2021).
- 407 35 Yang, Q., Bermingham Na Fau - Finegold, M. J., Finegold Mj Fau - Zoghbi, H. Y. & Zoghbi, H. Y.  
408 Requirement of Math1 for secretory cell lineage commitment in the mouse intestine.
- 409 36 McKinley, K. L. *et al.* Cellular aspect ratio and cell division mechanics underlie the patterning of  
410 cell progeny in diverse mammalian epithelia. *eLife* **7**, e36739, doi:10.7554/eLife.36739 (2018).
- 411 37 Batlle, E. *et al.*  $\beta$ -Catenin and TCF Mediate Cell Positioning in the Intestinal Epithelium by  
412 Controlling the Expression of EphB/EphrinB. *Cell* **111**, 251-263,  
413 doi:[https://doi.org/10.1016/S0092-8674\(02\)01015-2](https://doi.org/10.1016/S0092-8674(02)01015-2) (2002).
- 414 38 Stamatakis, D. *et al.* Delta1 Expression, Cell Cycle Exit, and Commitment to a Specific Secretory  
415 Fate Coincide within a Few Hours in the Mouse Intestinal Stem Cell System. *PLOS ONE* **6**,  
416 e24484, doi:10.1371/journal.pone.0024484 (2011).
- 417 39 Zhao, M. L. *et al.* Molecular Competition in G1 Controls When Cells Simultaneously Commit to  
418 Terminally Differentiate and Exit the Cell Cycle. *Cell Reports* **31**, 107769,  
419 doi:<https://doi.org/10.1016/j.celrep.2020.107769> (2020).
- 420 40 Sancho, R., Cremona, C. A. & Behrens, A. Stem cell and progenitor fate in the mammalian  
421 intestine: Notch and lateral inhibition in homeostasis and disease. *EMBO Rep* **16**, 571-581,  
422 doi:10.15252/embr.201540188 (2015).
- 423 41 Schapiro, D. *et al.* histoCAT: analysis of cell phenotypes and interactions in multiplex image  
424 cytometry data. *Nature Methods* **14**, 873-876, doi:10.1038/nmeth.4391 (2017).
- 425 42 Giesen, C. *et al.* Highly multiplexed imaging of tumor tissues with subcellular resolution by mass  
426 cytometry. *Nature Methods* **11**, 417-422, doi:10.1038/nmeth.2869 (2014).

427

428

429

430 **Figures**

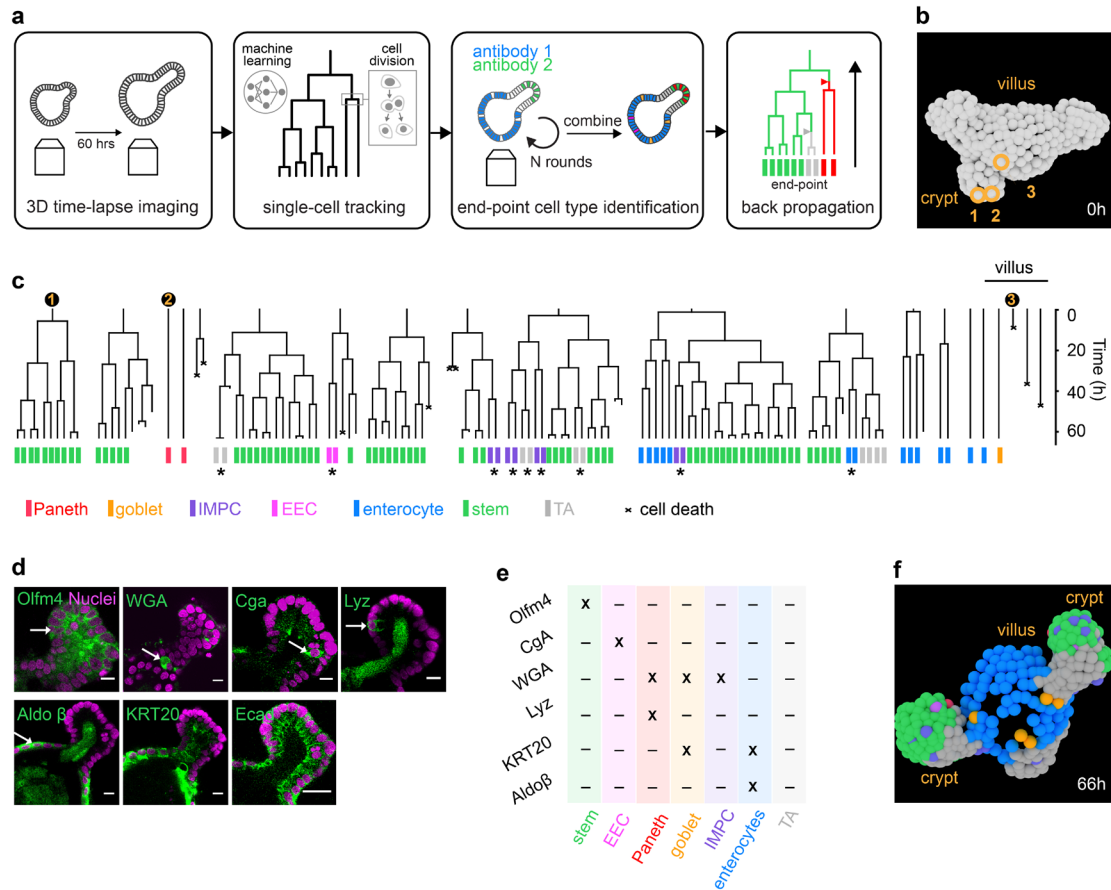

431  
432

433 **Fig. 1 | TypeTracker method overview and primary data.** **a**, Method workflow. Step 1: Image  
 434 several organoids in 3D for 60h. Step 2: Track all cells and determine lineage tree using  
 435 convolutional neural network. Step 3: Identify cell type at movie endpoint using multiple rounds of  
 436 antibody staining. Step 4: Map cell types onto lineage tree, and infer historical cell types including  
 437 type transitions (triangles). **b**, Reconstructed cell positions at start of lineage tree. **c**, Example  
 438 lineage trees and their mapped endpoint cell types. Numbers: lineages of three cells seen in panel  
 439 **b**. Stars: endpoint sister pairs of same type, but of different type than cousins, suggesting type  
 440 transition in mother cell. **d**, Nuclear marker (magenta) and antibody or dye staining (green):  
 441 Olfactomedin 4 (Olfm4), Wheat Germ Agglutinin (WGA), Chromogranin A(Cga), Lysozyme (Lyz),  
 442 Aldolase  $\beta$  (Aldo $\beta$ ), Cytokeratin 20 (Krt20) and Ecadherin (Ecad). **e**, Cell type identification table.  
 443 **f**, Reconstructed cell positions and type at end of the lineage tree (panel **c**), 66 hours after the  
 444 start (panel **b**).

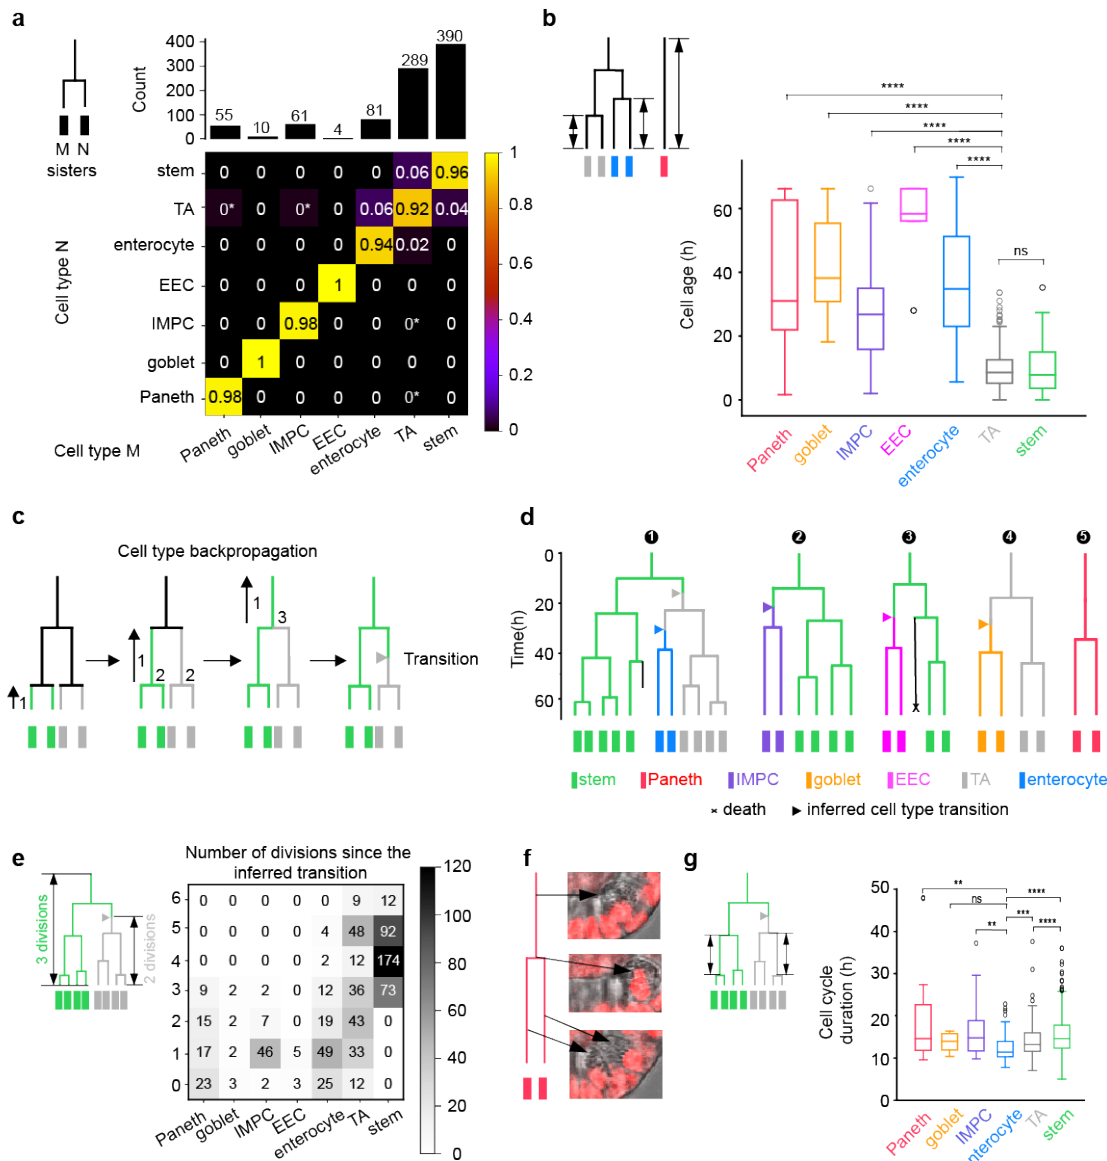

445

446 **Fig. 2 | Differentiation pathways and cell type commitment.** **a**, 2D histogram indicating the  
 447 two cell types of sisters at the movie endpoint, as determined using antibody staining. Shown is  
 448 the number of times a cell type combination was observed divided by the total of each column,  
 449 indicated on top. Star: low frequency resulting from a single observation. The dominant diagonal  
 450 shows sisters typically have the same type. **b**, Age of stained cells, quantified as the time since  
 451 the last division, or since movie start for lineages without division. \*\*\*\*,  $p \leq 0.0001$ ; \*\*\*,  $p \leq 0.001$ ;  
 452 \*\*,  $p \leq 0.01$ ; \*,  $p \leq 0.05$ ; ns,  $p > 0.05$ . TA cells show the same age as stem cells, indicating their  
 453 proliferative nature. Consistently, the differentiated cells (EECs, enterocytes, Paneth and goblet  
 454 cells) are older. **c**, Cell-type backpropagation rules. 1: working backwards along each lineage, the

455 inferred type is unchanged when not encountering branchpoints (divisions). 2: for branchpoints,  
456 if both daughters are the same type, the mother is assigned that type. 3: If only one daughter a  
457 stem cell, the mother is assigned as a stem cell. 4 (not shown): If only one daughter is a TA cell,  
458 and the other is not a stem cell, the mother is assigned as a TA cell. In cases 3 and 4, a type-  
459 transition is inferred in one daughter (triangle). **d**, Example lineage trees as determined by  
460 TypeTracker. **e**, Number of observed divisions for each cell type. **f**, Paneth cell divisions. Granules  
461 are seen before and after division, evidencing Paneth cell division. **g**, Cell cycle duration for  
462 different cell types. Cell cycle durations were notably similar between types, while enterocytes  
463 exhibited lower mean cell cycle durations than TA cells, stem cells and the secretory cell types.  
464 All data in this figure were from nine organoids.

465

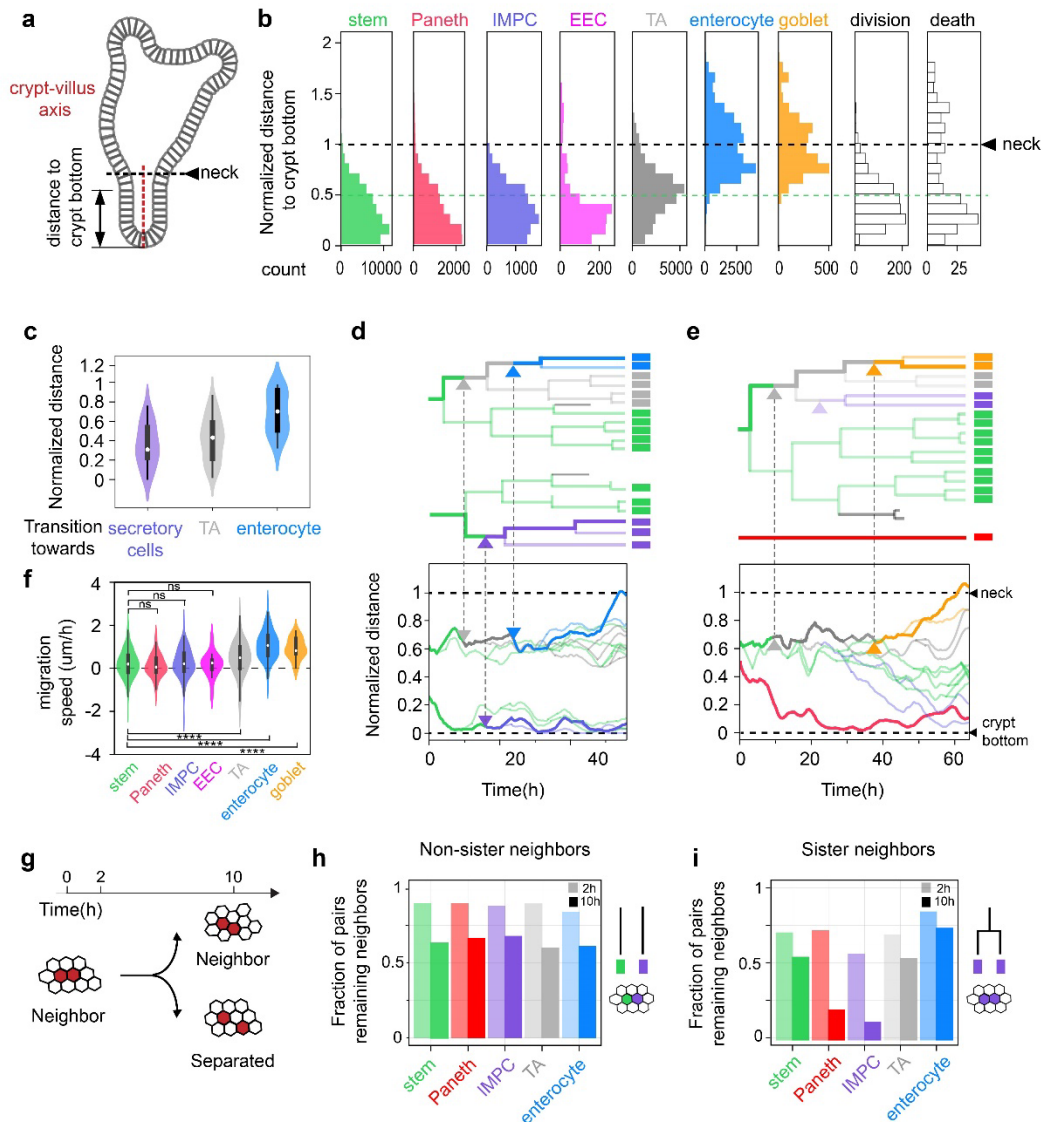

466

467 **Fig. 3 | Spatio-temporal differentiation program.** **a**, Organoid schematic diagram. **b**, Inferred  
 468 cell types mapped along the normalized crypt-villus axis. **c**, Position of cells when they commit to  
 469 a new type. **d** and **e**, Lineage trees mapped in space along the crypt-villus axis. Bottom trees:  
 470 Transition to IMPC and position of Paneth cell deep in the crypt surrounded by stem cells. Top  
 471 trees: Transitions to enterocytes or goblet cells higher in the crypt, but close to their stem cell  
 472 relatives, followed by their movement to the villus region, rather than the other way around. **f**, Cell  
 473 migration speed, as quantified by the migration distance along the crypt-villus axis after  
 474 commitment or movie start, divided by the migration time. **g**, Diagram showing that cell separation  
 475 is quantified as the fraction of neighboring cells that remain so after 2 and 10 h. **h**, Cell separation  
 476 of neighbors. This neighbor loss can be quantified for each cell type. Most neighbors remained  
 477 neighbors even after 10h, independently of cell type. **i**, Cell separation of sisters. Here the sisters

478 generally are of the same type, due to the fate symmetry of sisters. Sisters thus separate faster  
479 than non-sisters, in particular sister Paneth cells and IMPCs.
