# Supplementary material for: Following cell type transitions in space and time by combining live-cell tracking and endpoint cell identity in intestinal organoids
Source: bioRxiv or medRxiv preprint supplement (doi:10.1101/2022.06.27.497728), 2022-06-29
Supplement: Supplementary file [file media-1.pdf]

## 480 **Methods**

481 **Organoid culture.** Murine intestinal organoids carrying both a H2B-mCherry reporter and a Lgr5-  
482 GFP reporter were gifts from Norman Sachs and Joep Beumer, from the group of Hans Clevers  
483 in Hubrecht Institute. Organoids were embedded in 'domes' of basement membrane extract (BME,  
484 Trevingen) in tissue culture plates. They were further submerged in growth medium consisting of  
485 murine recombinant epidermal growth factor (EGF 50 ng/ml, Life Technologies), murine  
486 recombinant Noggin (100 ng/ml, Peprotech), human recombinant R-spondin 1 (500 ng/ml,  
487 Peprotech), n-Acetylcysteine (1 mM, Sigma-Aldrich), N2 supplement (1x, Life Technologies) and  
488 B27 supplement (1x, Life Technologies), Glutamax (2 mM, Life Technologies), HEPES (10 mM,  
489 Life Technologies), Penicilin/Streptomycin (100 U/ml 100 µg/ml, Life Technologies) in Advanced  
490 DMEM/F-12 (Life Technologies). Organoids were kept in incubators at 37 °C and with 5 % CO<sub>2</sub>.  
491 The medium was changed every two days. Each week, organoids were passaged by  
492 mechanically dissociating crypts using a narrowed glass pipette.

493 **Organoid sample preparation for imaging.** In conventional culture conditions, organoids were  
494 embedded in 'domes' of BME droplets and were thus at different heights relative to the plate  
495 bottom (**Extended Data Fig. 1a**). Imaging organoids located far from the plate bottom required  
496 long working distance objectives and increased light exposure, leading to excessive phototoxicity.  
497 To improve the imaging procedures, we used the 4 well chambered cover glass (# 1.5 high  
498 performance cover glass) from Cellvis as imaging plates. Organoids were broken into single  
499 crypts, seeded in the imaging plates and put in fridge (~ 4 °C) for ~ 10 minutes, allowing them to  
500 sink downwards to the cover glass. Afterwards, they would be incubated at 37 °C with 5 % CO<sub>2</sub>  
501 for 20 minutes so that the gel could solidify with organoids settled at the bottom of the wells  
502 (**Extended Data Fig. 1b**). Growth medium was added after the incubation. Organoids were then  
503 kept in the incubator for around 2 days until the imaging experiments.

504  
505 **Time-lapse imaging with 3D confocal microscope.** Time-lapse imaging was performed with a  
506 scanning confocal microscope (Leica TCS SP8) with a 40 x water immersion objective (NA =  
507 1.10). Experiments were performed at 37 °C and 5 % CO<sub>2</sub>. More than 20 organoids with already  
508 budded crypts were selected for imaging. Stacks of ~ 30 z-slices with 2 µm step size were taken  
509 every 12 minutes per organoid. At each timepoint, imaging of H2B-mCherry was conducted with  
510 an excitation laser of 552 nm at 1 % of the laser power and the emission signals were collected  
511 with Leica HyD hybrid detectors whose filter range was set to be 557 nm - 789 nm.

512  
513 **Live-cell tracking.** Live-cell tracking was conducted by OrganoidTracker, a software developed  
514 by our group<sup>1</sup>. The positions of each nucleus were predicted with a trained neural network and  
515 cells were then automatically linked between frames based on the relative positions and nuclear  
516 sizes. The software could report warnings when the linking was less reliable and allowed for  
517 manual corrections.

518  
519 **3D reconstruction.** 3D reconstruction of organoids were made with Blender, a free and open-  
520 source 3D computer graphics software. Each cell was represented by a 3D sphere and could be  
521 colored based on the (inferred) cell types (**Fig. 1b,f**).

522  
523 **Organoid fixation and permeabilization.** Organoid samples were fixed with 4 % formaldehyde  
524 (Sigma-Aldrich) at room temperature. In order to get rid of the gel but keep the organoids attached  
525 to the plate, we optimized the fixation protocol. After adding formaldehyde, we waited for ~ 10  
526 minutes and then gently washed the sample with PBS to remove the gel, which otherwise would

527 hinder the penetration of antibodies and reduce imaging quality. 10 minutes was the optimized  
 528 waiting time to ensure gel removal and more than 50 % of the imaged organoids attached to the  
 529 cover glass (**Extended Data Fig. 1c**). After gel removal, organoid samples were incubated in  
 530 formaldehyde again for 20 minutes to complete the fixation procedures. Following fixation,  
 531 permeabilization was performed by incubating the samples in 0.2 % Triton-X-100 (Sigma-Aldrich)  
 532 for one hour at room temperature. All the washing procedures were performed gently to avoid  
 533 removing organoids from the cover glass.

534  
 535 **Staining with antibodies and dyes.** Following fixation and permeabilization, organoids were  
 536 blocked with 5 % skim milk in TBS at room temperature for one hour. Subsequently, organoids  
 537 were incubated in blocking buffer containing primary antibody (see section antibodies) for two  
 538 days at 4 °C, and then incubated with secondary antibody (see section antibodies) at room  
 539 temperature for one hour. These procedures would be repeated for each antibody. Regarding the  
 540 dyes, organoids were incubated with Wheat germ agglutinin (WGA) conjugated to CF@488A (5  
 541 ug/ml Biotium) at room temperature for two hours and with RedDot™1 Far-Red Nuclear stain (1 :  
 542 200 Biotium) or SYTOX™ Orange Nucleic Acid Stain (1 : 5000 Thermo Fisher Scientific #S 11368)  
 543 at room temperature for 20 minutes.

544  
 545 **Antibody stripping.** After imaging the results from each round of antibody staining, the primary  
 546 antibodies were removed by incubation with elution buffer at room temperature for 15 minutes  
 547 while shaking<sup>2</sup>. This was repeated six times with the elution buffer replaced between consecutive  
 548 cycles. The elution buffer was prepared by adding 0.5 M Glycine (Sigma-Aldrich), 5 M Urea  
 549 (Sigma-Aldrich), 5 M Guanidinium chloride (Sigma-Aldrich), 70 mM TCEP-HCL (Sigma-Aldrich)  
 550 to H<sub>2</sub>O, with pH adjusted to 2.5.

551  
 552 **Antibodies and dyes**  
 553

| Primary antibodies                                         | Dilution | Product information                 |
|------------------------------------------------------------|----------|-------------------------------------|
| Rabbit anti-lysozyme [EC 3.2.1.17]                         | 1 : 800  | Dako #A0099                         |
| Rabbit anti-Olfm4 [D6Y5A] XP®                              | 1 : 500  | Cell signaling technology #39141    |
| Recombinant rabbit anti-Aldolase B + Aldolase C [EPR3138Y] | 1 : 300  | Abcam #ab75751                      |
| Mouse anti-Human Cytokeratin 20 [Clone Ks20.8]             | 1 : 500  | Dako #M701929-2                     |
| Mouse anti-Chr-A [C-12]                                    | 1 : 50   | Santa Cruz Biotechnology #sc-393941 |
| Rat anti-E-cadherin [DECMA-1]                              | 1 : 400  | Santa Cruz Biotechnology #sc-59778  |

554

| Dyes                             | Dilution | Product information              |
|----------------------------------|----------|----------------------------------|
| WGA conjugated to CF@488A        | 5 ug/ml  | Biotium                          |
| RedDot™1 Far-Red Nuclear stain   | 1 : 200  | Biotium                          |
| SYTOX™ Orange Nucleic Acid Stain | 1 : 5000 | Thermo Fisher Scientific #S11368 |

555

| Secondary antibodies                                      | Dilution | Product information   |
|-----------------------------------------------------------|----------|-----------------------|
| Goat anti-rabbit IgG H&L (Alexa Fluor@405) pre-adsorbed   | 1 : 1000 | Abcam #ab175654       |
| Goat anti-Rat IgG H&L (Alexa Fluor@555) pre-adsorbed      | 1 : 1000 | Abcam #ab150166       |
| Donkey anti-Mouse IgG H&L (Alexa Fluor@647)               | 1 : 500  | Thermo Fisher #A31571 |
| Donkey anti-Rabbit IgG H&L (Alexa Fluor@405) pre-adsorbed | 1 : 1000 | Abcam #ab175649       |

556

557 The order of staining, optimized to ensure good staining quality for all cell types, was based on  
558 the staining quality and stripping difficulty of each antibody (**Extended Data Fig. 1f**).  
559

560 **Cell type identification.** Olfactomedin 4 (Olfm4) and Chromogranin A (Cga) stained stem and  
561 enteroendocrine cells (EECs) respectively<sup>3,4</sup>. Paneth and goblet cells were both stained by Wheat  
562 Germ Agglutinin (WGA), which stains mucus<sup>5</sup>, and could be distinguished by affinity for Lysozyme  
563 (Lyz) and Cytokeratin 20 (KRT20) respectively. We also found cells labelled solely by WGA, which  
564 may be early Paneth or goblet cells, and were referred to as immature mucus producing cells  
565 (IMPCs). Enterocytes were stained by Aldolase  $\beta$  (AldoB) as well as KRT20<sup>2,6</sup>. A number of cells  
566 were negative for all the used markers and were referred as transit-amplifying (TA) cells.  
567

568 **Mapping endpoint cell types to lineages.** During time-lapse imaging, the Leica software  
569 allowed recording of the imaged locations, which could thus be found back after imaging. To  
570 achieve this, the mounting stage of the microscope and the orientation of the cover glass should  
571 be consistent with the settings during time-lapse imaging. With our optimized protocols for sample  
572 preparation and fixation (see Section Organoid fixation, permeabilization and staining), we could  
573 keep more than 50 % of the imaged organoids with limited deformations in the plate after fixation.  
574 After staining and relocating the organoids that were imaged in time during growth, mapping all  
575 cells (including their type information) to the cells that were tracked could be still challenging, due  
576 to the constant movement of cells during growth and global rotation and deformation of organoids  
577 caused by the fixation and repeated staining and washing. To mitigate these issues, we fixed the  
578 organoids within 5 minutes after the time-lapse imaging and performed every washing step gently,  
579 in order to preserve the spatial context of single cells. The linking of cells before and after fixation  
580 could be achieved mostly based on the spatial context of each cell. Linking was done in two steps.  
581 In a first automated step, we used a min-cost flow solver algorithm<sup>7</sup>, which integrally optimizes  
582 the linking for all the tracked cells, and was also employed for the similar task of tracking cells  
583 between frames during organoid growth. In a second step, we manually corrected the automated  
584 linking results by visual inspection of the movie and staining images. The fluorescence intensity  
585 of H2B-mCherry showed heterogeneity between cells during time-lapse imaging, which could be  
586 preserved during fixation. Therefore, the brightness of the nuclear marker could also assist cell  
587 linking before and after fixation.  
588

589 **Endpoint sister type analysis.** We studied the correlation of endpoint cell fates between sisters.  
590 For cells present at the endpoint, identified as specific type and with a sister, we checked the  
591 possible cell types of the sister pairs and counted the occurrence of each combination. For each  
592 cell type, we counted the number of sister pairs where at least one of them was of that type. If  
593 both sisters were of that type, the pair would be counted twice. Cells of different types had different  
594 abundance and majority of the sister pairs contained stem cells and/or TA cells. We then  
595 normalized the 2D histogram, via dividing the occurrence of each combination by the sum of each  
596 column, as shown in the bar plot in **Fig. 2a**. Therefore, the frequency within each column in **Fig.**  
597 **2a** would sum up to be 1. The analysis was based on nine different organoids.  
598

599 **Cell age distribution analysis.** For cells present at the endpoint, we could check the history of  
600 them and find the time when they were born. The duration between the birth time and the endpoint  
601 of imaging was measured as the cell age. Some cells were present from the beginning till the end.  
602 Their ages were then measured by the total length of the imaging experiment duration (~ 60  
603 hours). The age distribution of each cell type was studied and plotted as a box plot in **Fig. 2b**,  
604 followed by statistical significance tests. Box plot elements represent the following: center line:  
605 median; box, quartiles; whiskers, range; fliers, outliers. The analysis was based on seven different  
606 organoids from experiments lasting ~ 60 hours.  
607

608 **Analysis within (sub-)trees containing two cell types.** All of the (sub-) lineage trees with two  
609 different cell types were taken into account, unless more than 50 % of the cells within the lineage  
610 could not be tracked or died. The absolute count of each possible combination of the two cell  
611 types was shown in the 2D histogram (**Extended Data Fig. 6**).

612  
613 **Cell type backpropagation.** The assumption underlying the backpropagation of cell types is that  
614 changes in cell types are rare. This assumption could be supported by the found type symmetry  
615 between sisters since frequent type changes likely lead to different types in sisters. Starting at the  
616 lineage endpoints, we propagate the measured endpoint types back in time following this process:

617  
618 ***Backpropagation along consecutive timepoints.** From one timepoint to a previous*  
619 *timepoint, the type is initially assigned as unchanged if no tree branch points (divisions) is*  
620 *traversed (marked '1' in Fig. 2c).*

621 ***Backpropagation of symmetric fate.** For cell types identified by endpoint staining, we*  
622 *observed that sisters almost always assumed the same fate (Fig. 2a), suggesting that this*  
623 *fate was already set in the mother cell. Generalizing this observation, we assumed that if*  
624 *both sisters have the same (inferred) cell type, the inferred cell type of the mother cell is*  
625 *the same (marked '2' in Fig. 2c). Regarding cells with a dead sister, the mother is inferred*  
626 *the same type as the living daughter.*

627 ***Backpropagation of asymmetric fate.** The above backpropagation rule does not apply*  
628 *if two daughters have different (inferred) cell types. Therefore, we introduced two addition*  
629 *backpropagation rules. First, if at least one daughter's (inferred) cell type was stem cell,*  
630 *then the inferred cell type of the mother was also stem cell (marked '3' in Fig. 2c). Second,*  
631 *if the (inferred) cell type of one daughter was TA and the other daughter was not stem cell,*  
632 *then the inferred cell type of the mother was TA (not shown in Fig. 2c). These two rules*  
633 *were based on the capability of stem cells to generate all cell types and the transient*  
634 *property of TA cells between stem cells and differentiated cells.*

635 ***Forward propagation of cell type changes.** If a mother and a daughter cell had different*  
636 *(inferred) cell types, we interpreted this as a change in cell type that occurred during the*  
637 *lifetime of the daughter cell (marked with triangle in Fig. 2c,d).*

638  
639 These simple rules were sufficient to propagate backwards the lineage trees that we have  
640 encountered, unless the tree appeared very 'broken' where majority of the cells could not be  
641 tracked or died. All the lineage trees after backpropagation were shown in **Extended Data Fig. 4**.

642  
643 **Imaging of a Lgr5 reporter.** To test our backpropagation method, we performed time-lapse  
644 imaging, endpoint staining and live-cell tracking in an organoid line with both Lgr5-GFP, a well-  
645 known stem cell marker, and a H2B-mCherry reporters. To limit phototoxicity caused by GFP  
646 imaging, we sampled the GFP channel about every 8 hours. The time-lapse imaging lasted for  
647 more than 24 hours, followed by endpoint staining.

648  
649 Quantification of the membrane bound Lgr5-GFP fluorescence signals was conducted by  
650 determining the average fluorescence intensity within a 2D sphere with a diameter of 12  $\mu\text{m}$ ,  
651 which was sufficiently large to include one cell (**Extended Data Fig. 5a**). The Olfm4 staining was  
652 on the membrane as well and measured with the same method. The Lgr5 signal at the endpoint  
653 was plotted against the measured Olfm4 intensity (**Extended Data Fig. 5b**).

654  
655 We quantified the fluorescence intensity of Lgr5-GFP in time. There were only few frames where  
656 Lgr5-GFP was imaged, therefore, most cells were only present in one or two of such frames. For  
657 cells only present in one frame, the measured GFP fluorescence within that frame would  
658 represent their Lgr5 signals. For cells present in multiple frames, their Lgr5 signals were obtained

659 by averaging the GFP fluorescence between different frames. Quantification of Lgr5-GFP signals  
660 was performed for different (inferred) cell types (**Extended Data Fig. 5c**). For lineages inferred to  
661 lose stemness and transition to the TA type, we plotted the Lgr5 signals in time during the lineage  
662 progression (**Extended Data Fig. 5d**).

663  
664 **Measuring locations of cells along the crypt-villus axis.** At each timepoint, the crypt-villus axis  
665 was manually annotated in the  $xy$  plane at the  $z$  position corresponding to the center of the crypt,  
666 since tracked crypts grew perpendicularly to the objective. Three to six points were marked along  
667 the axis, through which a spline curve was interpolated as the axis. For each tracked cell  $i$  we  
668 determined its position along the spline by finding the value of  $r_i$  that minimized the distance  $d$   
669 between the cell position and the axis (**Extended Data Fig. 7a**). The bottom-most cell of the crypt,  
670 i.e. that with the lowest value of  $r_i$ , was defined as position zero. Based on the shape and  
671 curvature of the epithelium, the location of crypt neck (where there was a sharp transition from  
672 crypt to villus) was estimated and annotated manually, as an indication of the length of the crypt.  
673 Since different crypts were of various length, we did a normalization of the locations based on the  
674 crypt neck location. For each cell's measured distance in  $\mu\text{m}$  within a certain frame, we divided it  
675 by the distance from the crypt neck within the same frame to the crypt bottom. Therefore, the  
676 length from crypt neck to bottom would remain one for each timepoint and each crypt. With this  
677 measurement, both the locations of different (inferred) cell types and the type transitions were  
678 mapped along the crypt-villus axis (**Fig 3.a-e**).

679  
680 **Measurement of migration speed along the axis.** To estimate how fast a cell migrated along  
681 the axis, we searched for the locations of cells along the crypt-villus axis when they firstly showed  
682 up during tracking and the locations of cells when they were last present. The migration speed  
683 could be estimated by dividing the distance that the cell had migrated by the duration during which  
684 the cells were present (**Fig. 3f**).

685  
686 **Search for neighbors for each cell.** Defining neighboring cells in organoids based on nuclear  
687 signal is non-trivial. Cells could have varying numbers of neighbors because of the disorder in the  
688 epithelium. Distances between nuclei could vary between cell types and location (spread apart in  
689 the villus-like region and closely packed in the crypts). To obtain robust neighbor pairs, we  
690 functionally defined neighbors as pairs of nuclei without another nucleus in between (**Extended**  
691 **Data Fig. 7d**). This condition was tested by a 'neighbor score', the ratio of the sum of the distances  
692 of the two cells of interest (A&B) to a third cell (S) and the distance between the two cells (A&B),  
693 namely  $\frac{d_{AS}+d_{BS}}{d_{AB}}$ . If the third cell S positioned perfectly in between the pair of interest A & B, the  
694 neighbor score would appear as the minimal value of 1 and A and B would not be identified as  
695 neighbors. If A and B were not separated by S, the three nuclei would form a triangle with high  
696 neighbor score between A and B. For each cell, we calculated the neighbor score for the twenty  
697 closest neighbors (in Euclidean distance) at every timepoint. If the neighbor score were higher  
698 than  $\sqrt{2}$ , we would consider them neighbors. This cut-off corresponded to diagonal neighbors in  
699 the case of a perfect square lattice. Using this cut-off, we found most cells with five or six  
700 neighbors, exactly as expected for the basal side of a curved epithelium<sup>8</sup>.

701  
702 **Measurement of separation rate.** Separation rates were determined by following pairs of  
703 neighbors over time. For a new born cell, its neighbors were searched and selected with the  
704 method introduced above. The selection was conducted one hour after division, so that the nuclei  
705 would have returned to the basal side of the epithelium. If the selected neighbors divided, we  
706 would continue tracking one of the daughters (selected randomly) so that the following of the  
707 neighbor pairs would not be cut short by division. The separation rates were measured after  
708 following the neighbor pairs for 2 hours and 10 hours, by calculating the fraction the pairs staying

709 as direct neighbors within the total of pairs that were followed. Regarding the rearrangement rates  
710 of sisters, we followed the sister pairs that shared the same (inferred) cell type. Separation rates  
711 of sister pairs were also measured after 2 hours and 10 hours, by calculating the fraction of sisters  
712 staying as direct neighbors within the total number of sister pairs being followed (**Fig. 3h,i**).

713

714 **Analysis of isolated pairs of the same cell type.** We defined ‘isolated pairs’ as two nearby  
715 cells that are of the same type but surrounded by cells of other types. The two cells were either  
716 neighbors or one cell apart, therefore, they shared at least one common neighbor. Isolated pairs  
717 were identified at the endpoint using the introduced neighbor selection method (see Section  
718 Search for neighbors for each cell). We counted the occurrence of these pairs as sisters or not  
719 related cells and obtained the fraction of them as sisters. In this analysis, cells without a sister  
720 were excluded.

721

#### 722 **Reference:**

723

- 724 1 Kok, R. N. U. *et al.* OrganoidTracker: Efficient cell tracking using machine learning and  
725 manual error correction. *PLOS ONE* **15**, e0240802, doi:10.1371/journal.pone.0240802  
726 (2020).
- 727 2 Serra, D. *et al.* Self-organization and symmetry breaking in intestinal organoid  
728 development. *Nature* **569**, 66-72, doi:10.1038/s41586-019-1146-y (2019).
- 729 3 van der Flier, L. G., Haegebarth, A., Stange, D. E., van de Wetering, M. & Clevers, H.  
730 OLFM4 Is a Robust Marker for Stem Cells in Human Intestine and Marks a Subset of  
731 Colorectal Cancer Cells. *Gastroenterology* **137**, 15-17, doi:10.1053/j.gastro.2009.05.035  
732 (2009).
- 733 4 Louthan, O. Chromogranin a in physiology and oncology.
- 734 5 Bel, S. *et al.* Paneth cells secrete lysozyme via secretory autophagy during bacterial  
735 infection of the intestine. *Science* **357**, 1047-1052, doi:10.1126/science.aal4677 (2017).
- 736 6 Chan, C. W. M. *et al.* Gastrointestinal differentiation marker Cytokeratin 20 is regulated  
737 by homeobox gene CDX1. *Proceedings of the National Academy of Sciences* **106**, 1936,  
738 doi:10.1073/pnas.0812904106 (2009).
- 739 7 Haubold, C., Aleš, J., Wolf, S. & Hamprecht, F. A. in *Computer Vision – ECCV 2016*. (eds  
740 Bastian Leibe, Jiri Matas, Nicu Sebe, & Max Welling) 566-582 (Springer International  
741 Publishing).
- 742 8 Gómez, H. F., Dumond, M. S., Hodel, L., Vetter, R. & Iber, D. 3D cell neighbour dynamics  
743 in growing pseudostratified epithelia. *eLife* **10**, e68135, doi:10.7554/eLife.68135 (2021).

744

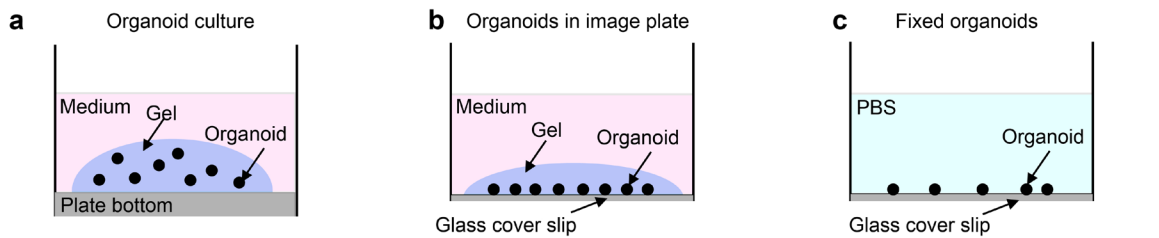

**d** Time-lapse imaging

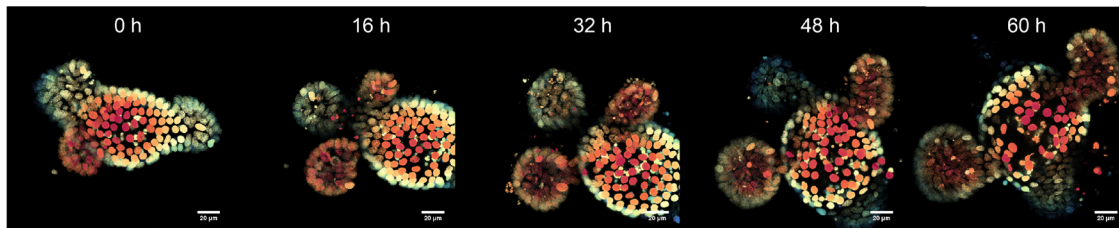

**e** Tracking

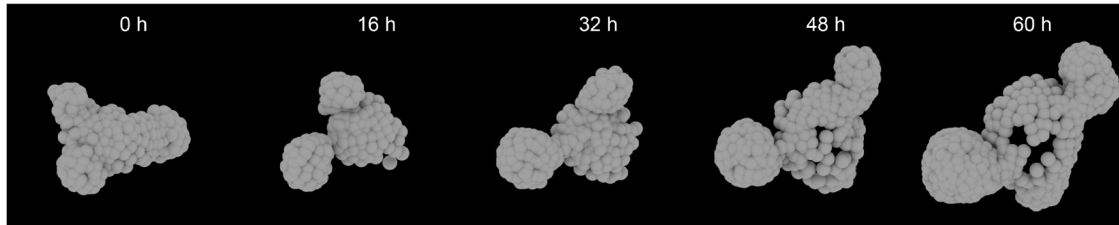

**f** The optimized staining order

| antibody binds to | round | excitation | emission | removal difficulty | staining signal |
|-------------------|-------|------------|----------|--------------------|-----------------|
| Olfm4             | 1     | 405nm      | 421nm    | Easy               | Dim             |
| CgA               | 1     | 647nm      | 675nm    | Easy               | Good            |
| WGA*              | 1     | 488nm      | 518nm    | Easy               | Good            |
| Aldo $\beta$      | 2     | 405nm      | 421nm    | Easy               | Good            |
| KRT20             | 2     | 647nm      | 675nm    | Difficult          | Good            |
| LYZ               | 3     | 405nm      | 421nm    | Difficult          | Good            |

745  
746

747 **Extended Data Fig. 1 | TypeTracker applied to mouse intestinal organoids.** **a**, For  
748 conventional organoid culture, organoids were scattered in 'domes' of BME gel and located at  
749 various heights. **b**, For time-lapse imaging, organoids were seeded in a thin layer of BME gel in  
750 chambered cover glass slides. Immediate after seeding, samples were put in fridges for 10  
751 minutes so that organoids all sank towards the cover glass. **c**, With our optimized protocol, more  
752 than 50 % of the imaged organoids would remain at their imaged locations after fixation. **d**, Time-  
753 lapse imaging of an organoid carrying the H2B-mCherry reporter with 3D confocal for 60 hours.  
754 Scale bar, 20  $\mu$ m. Color encodes different z planes. **e**, Live-cell tracking of the organoid. In these  
755 3D reconstructions, each cell was represented by a sphere centered at the estimated nuclear  
756 center. Cells were not tracked if they were located far away from the objective and would move  
757 away from the region of interest. **e**, The order of antibodies and dyes to use in different rounds  
758 was optimized based on the staining quality and stripping difficulty of each antibody.  
759

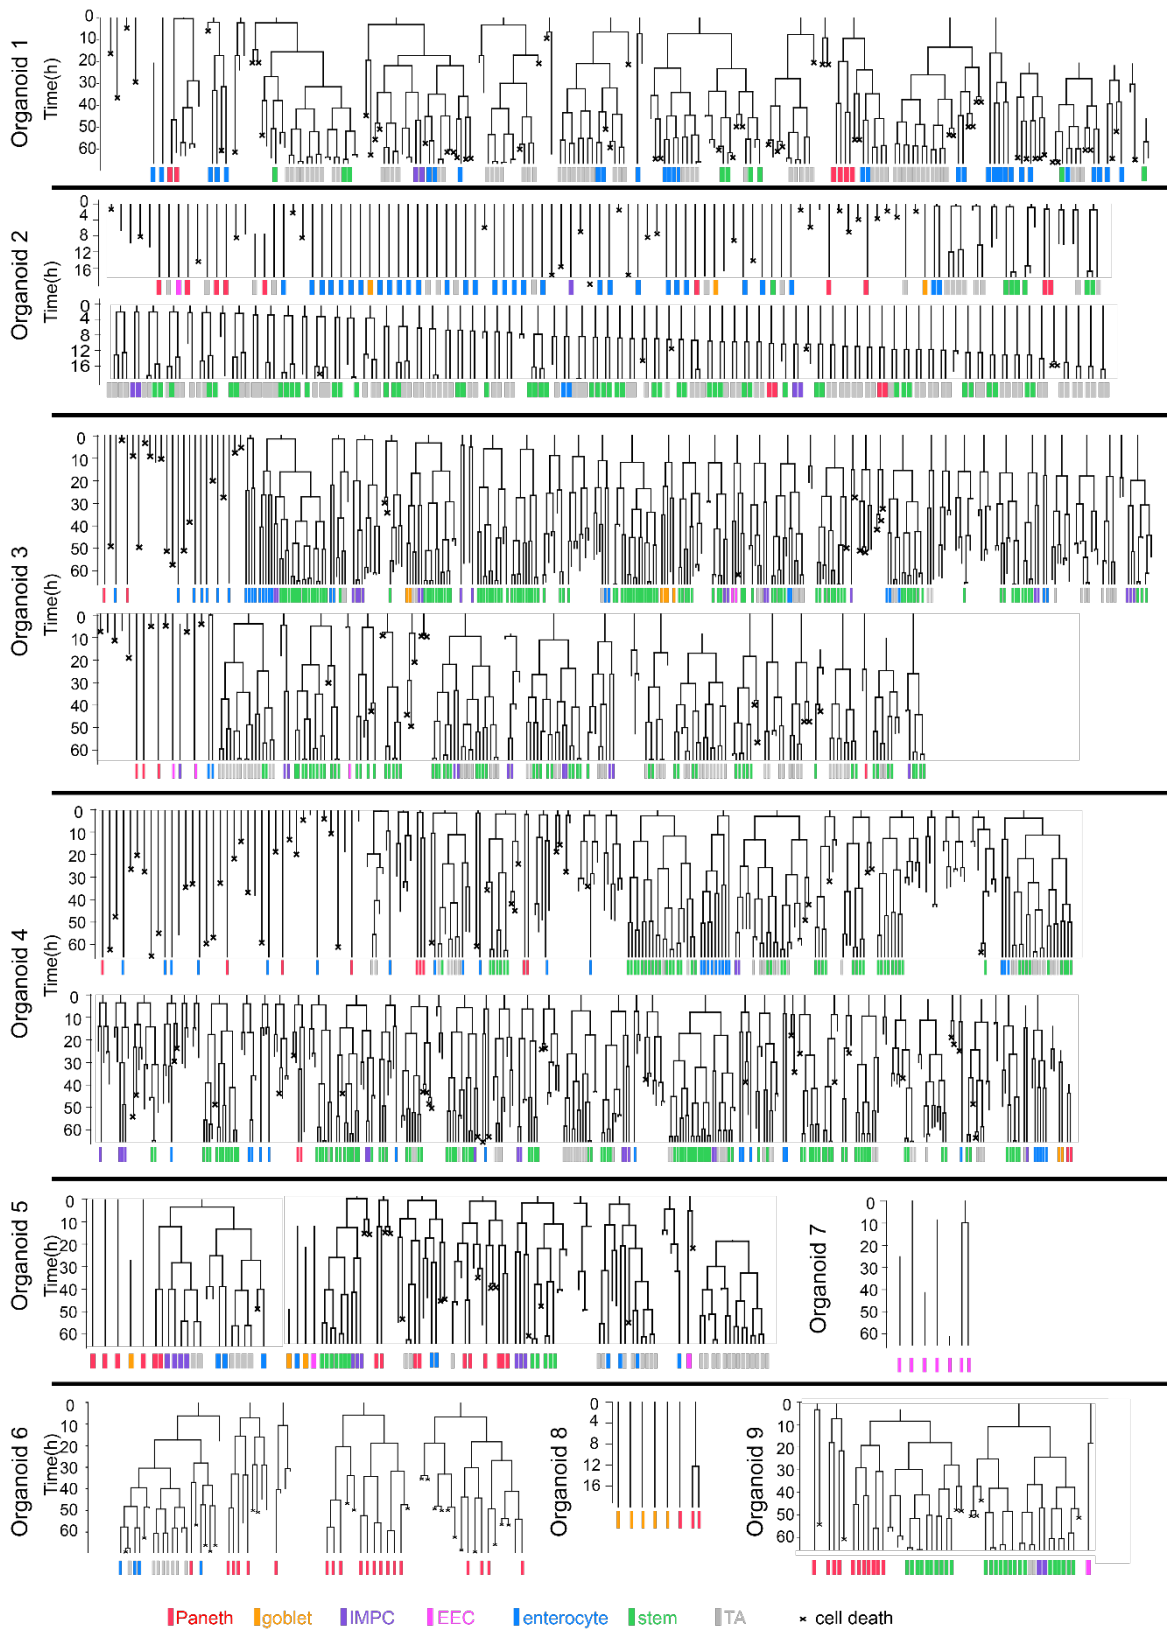

760  
761  
762  
763

**Extended Data Fig. 2 | Gallery of lineage trees, generated from live-cell tracking, with cell types mapped at the endpoint.** These trees are from nine different organoids.



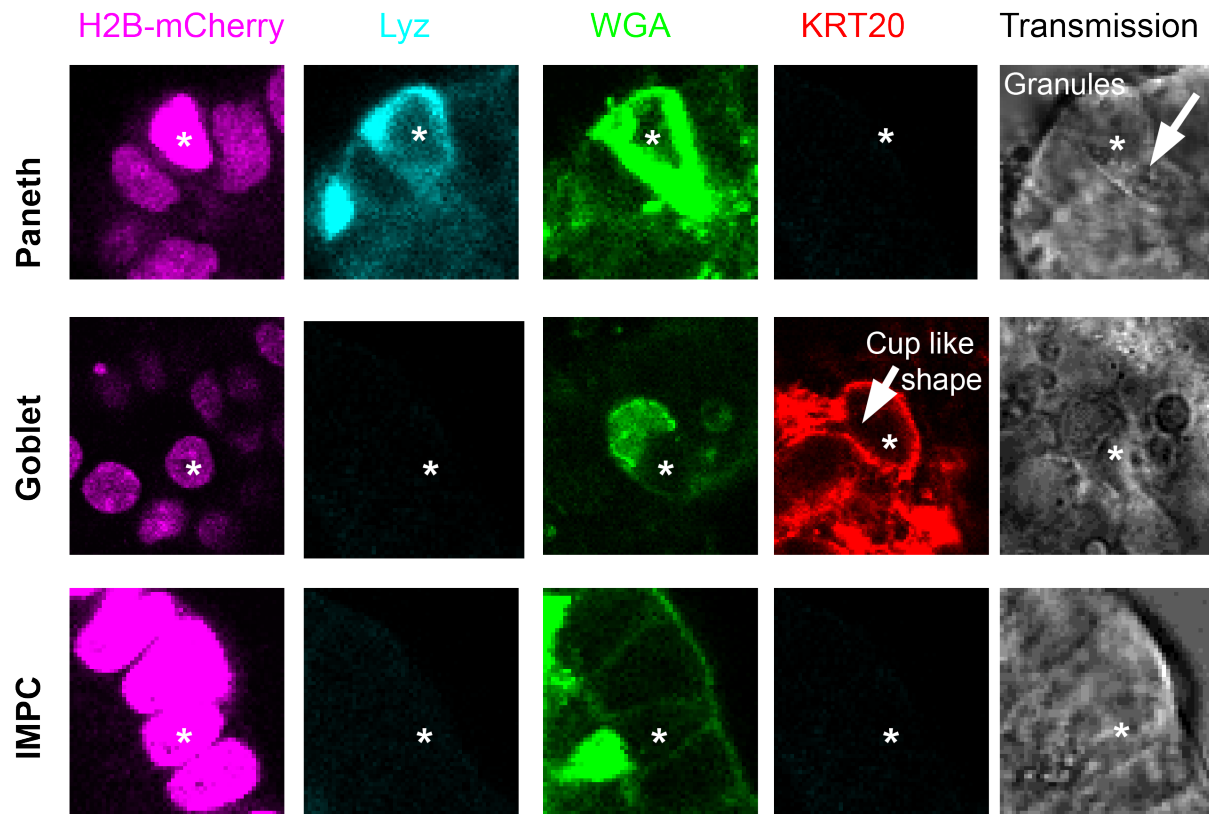

764  
765

766 **Extended Data Fig. 3 | The identification of mature Paneth cells and goblet cells.** Paneth  
767 cells (indicated with \* in row 1) often showed extremely bright H2B-mCherry fluorescence signals  
768 compared with the neighbor cells, bright Lysozyme (Lyz) fluorescence signals at the basal side  
769 of the cell, bright Wheat Germ Agglutinin (WGA) staining and granules in the transmission channel.  
770 Goblet cells (indicated with \* in row 2) often stained positive of Cytokeratin 20 (KRT20) and WGA,  
771 with a cup like shape. A group of cells that stained positive of WGA but negative of KRT20 or Lyz  
772 were called Immature Mucus producing cells (IMPCs, indicated with \* in row 3). These cells could  
773 be early Paneth cells or goblet cells considering the mucus secretion functions that they had.

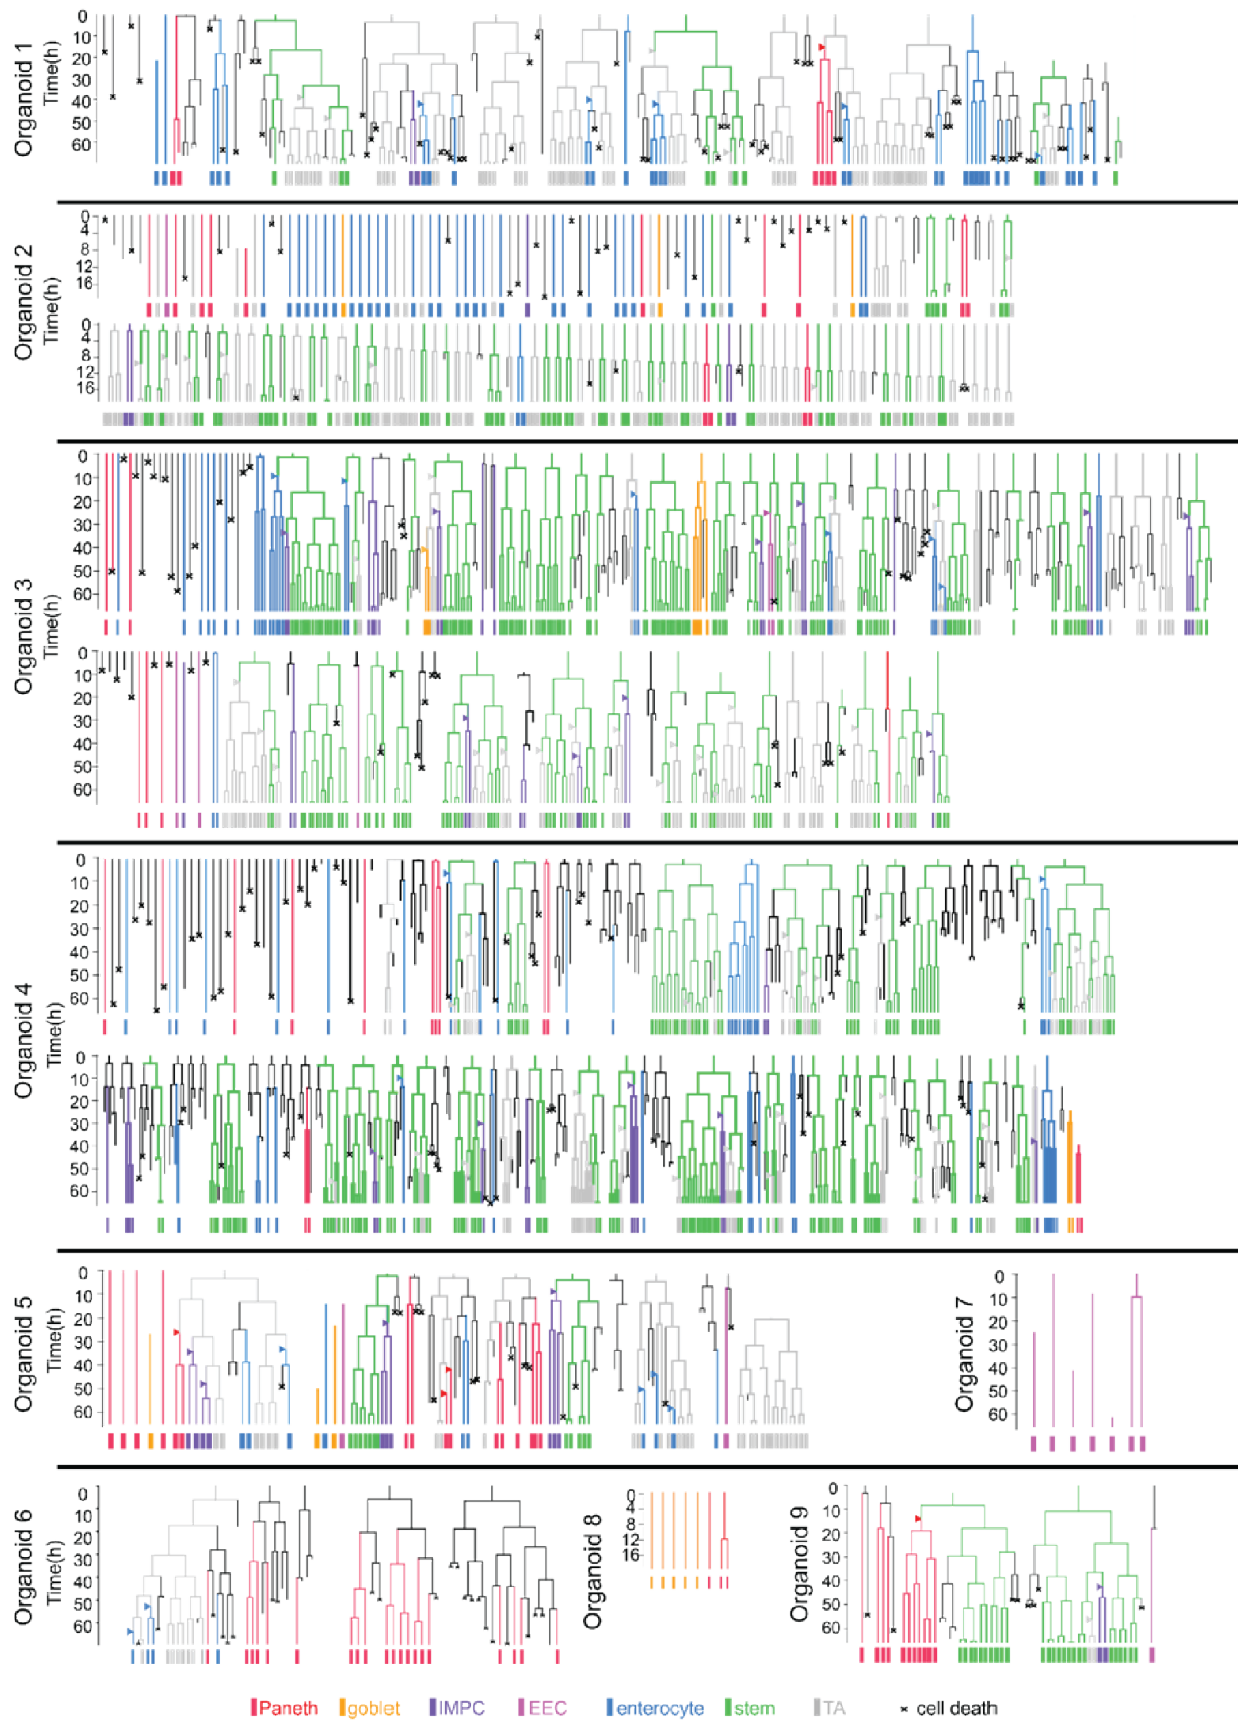

775 **Extended Data Fig. 4 | Gallery of lineage trees after backpropagation with inferred cell type**  
776 **transitions.** Inferred cell types are shown with different colors. Type transitions are indicated by  
777 triangles, colored based on which type the cell was inferred to transition towards. These trees are  
778 from nine different organoids.

779  
780  
781  
782  
783  
784  
785  
786  
787  
788  
789  
790  
791  
792  
793  
794  
795  
796  
797  
798  
799

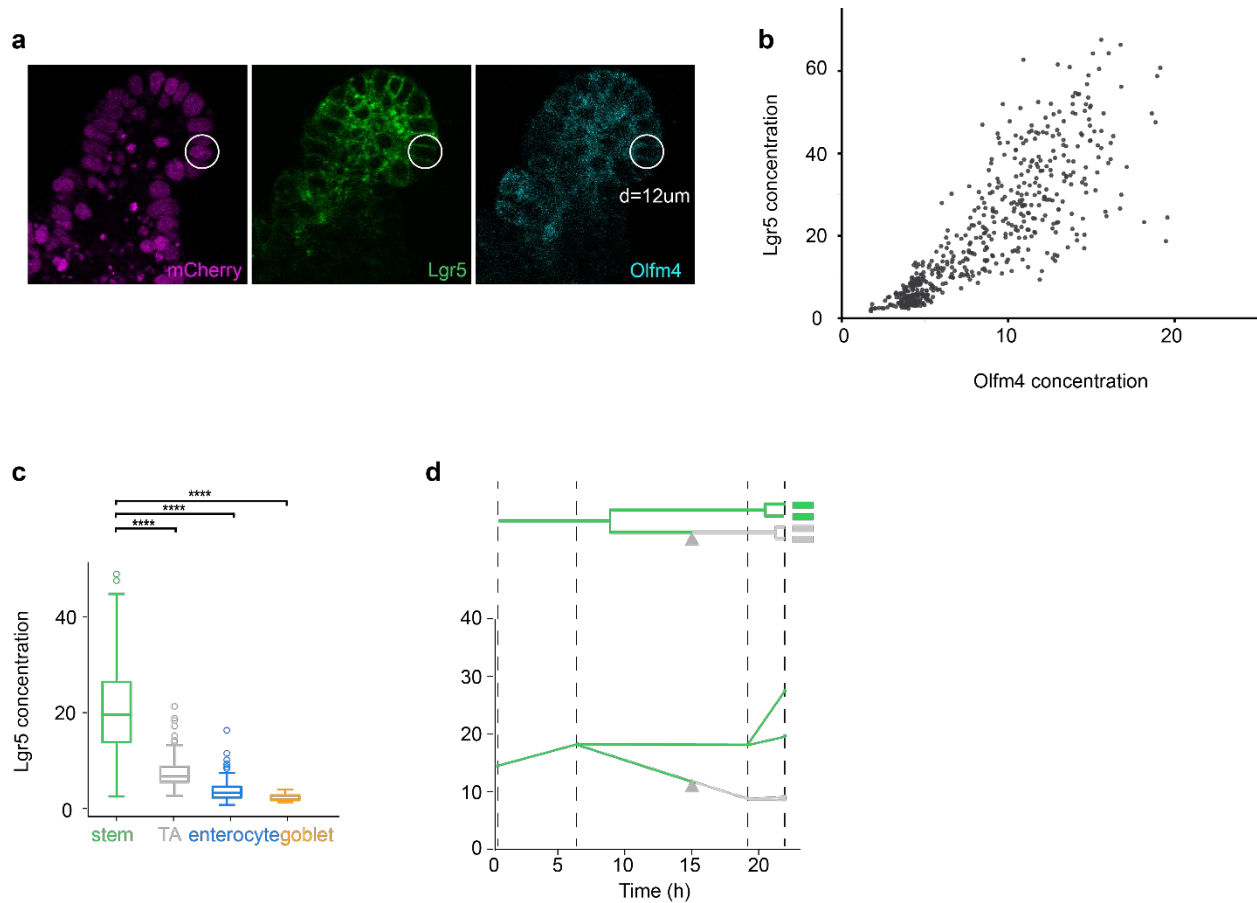

800  
801  
802  
803  
804  
805  
806  
807  
808  
809  
810  
811  
812

**Extended Data Fig. 5 | Imaging and tracking with a Lgr5 reporter confirmed the backpropagation method.** **a**, Images of the nuclei (H2B-mCherry), Lgr5-GFP (fluorescent reporter of stem cells) and Olfm4 (antibody used to identify stem cells). A 2D circle ( $d = 12 \mu\text{m}$ ) was used to measure the fluorescence concentration of each cell. **b**, The Lgr5 and Olfm4 fluorescence concentration, measured by averaging the fluorescence intensity within 2D circles as shown in **a**, were proportional in single cells. **c**, The Lgr5 fluorescence concentration plotted against different (inferred) cell types, with stem cells showing high Lgr5 concentration, TA cells showing lower concentration and enterocytes and goblet cells having almost no Lgr5 fluorescence signals. **d**, Lgr5 fluorescence concentration measured in lineages going through transitions from stem cells to TA cells. The concentration measured  $\sim 4$  hours after the inferred transition was much lower than the concentration measured  $\sim 8$  hours before the transition.

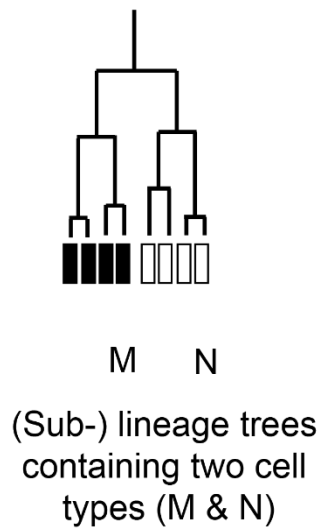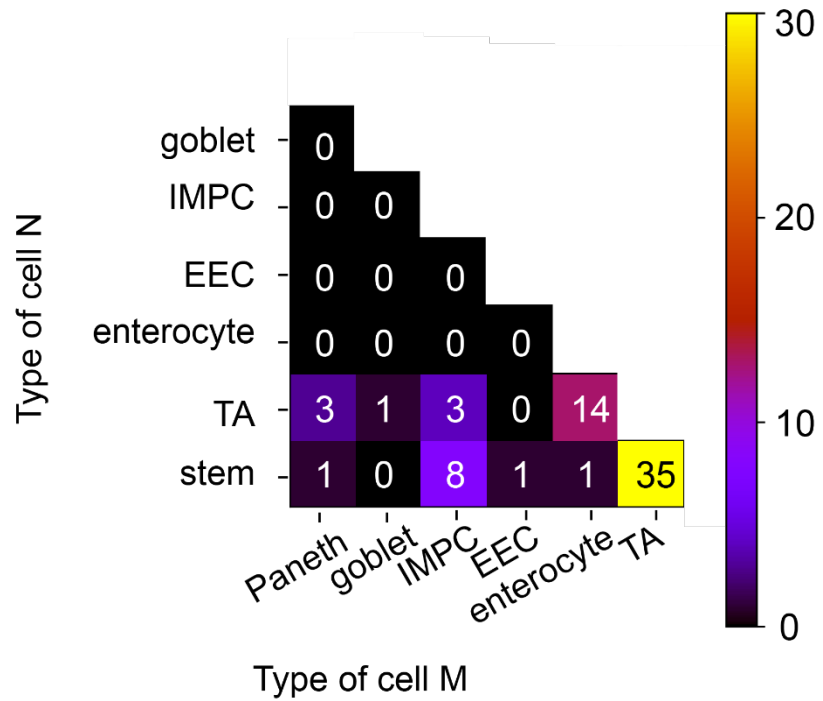

813  
814

815 **Extended Data Fig. 6 | (Sub-) lineage trees containing two cell types often had at least one**  
 816 **of the types as either stem cells or TA cells.** All of the (sub-) lineage trees with two different  
 817 cell types were taken into account, unless more than 50 % of the cells within the lineage could  
 818 not be tracked or died. The occurrence of each possible combination of the two cell types was  
 819 counted and shown in the 2D histogram. Combination of two different differentiated cell types,  
 820 such as enterocytes and goblet cells, was never found. Differentiated cells were often found  
 821 together with either stem cells or TA cells in the same lineage.

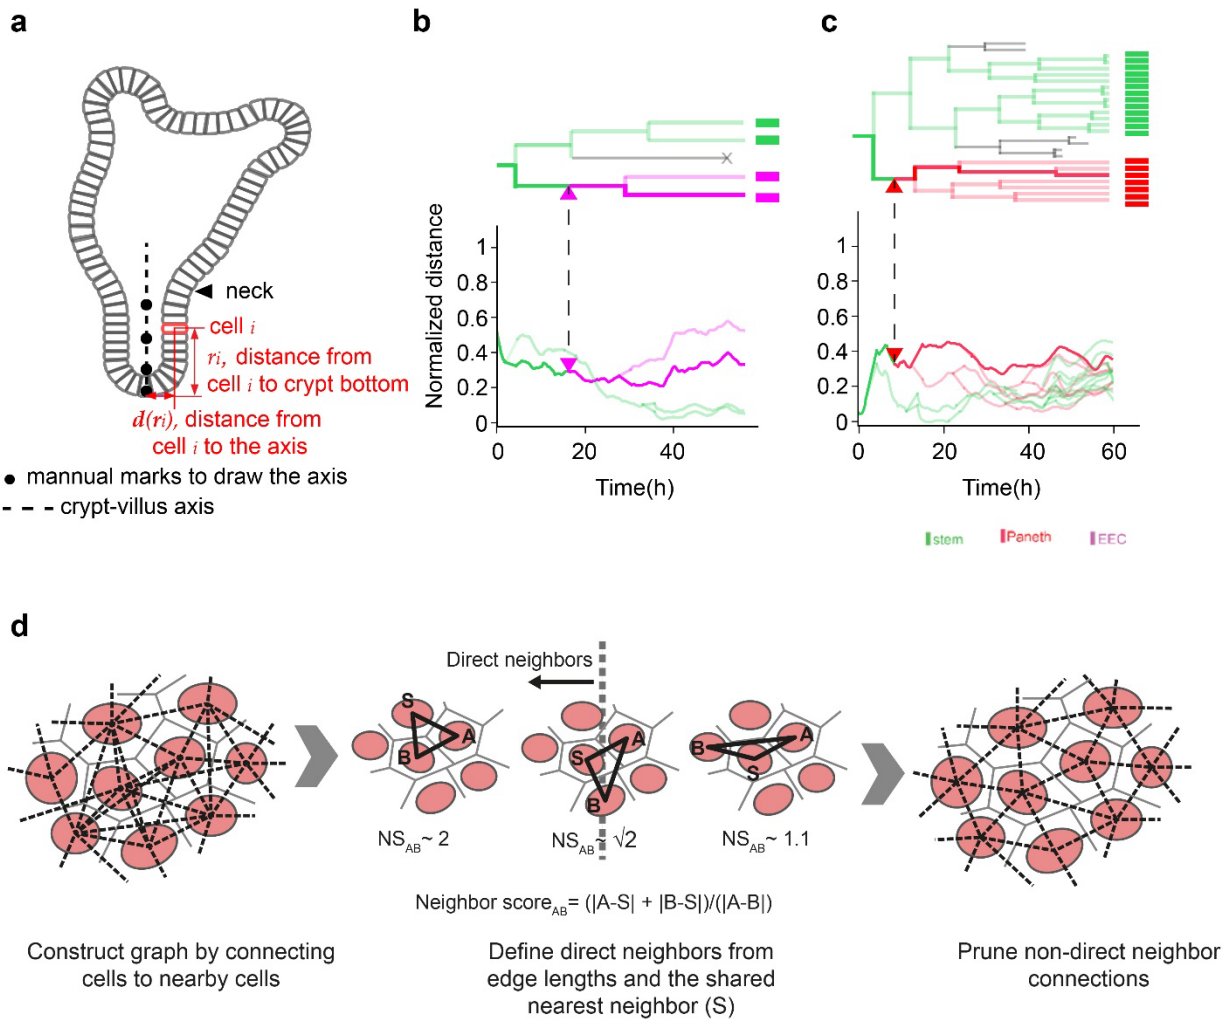

822  
823

824 **Extended Data Fig. 7 | Following the spatial organization of cells during differentiation.** **a**,  
825 The crypt-villus axis could be generated by interpolating through the manually annotated points.  
826 For each tracked cell  $i$ , we determined its position along the axis by finding the value of  $r_i$  that  
827 minimized the distance  $d(r_i)$  between the cell position and the axis. **b & c**, The moving trajectories  
828 of cells within different lineages were colored by inferred cell types. Transitions to EECs and  
829 Paneth cells took place deep in the crypt, around 0.4, surrounded by stem cells which were often  
830 found from 0 to 0.6 along the axis. **d**, Neighbors were defined as pairs of nuclei without another  
831 nucleus in between. For each cell, the neighbor score for the twenty closest cells (in Euclidean  
832 distance) was calculated at every timepoint. If the neighbor score were higher than  $\sqrt{2}$ , cells would  
833 be identified as neighbors.
